# Supplementary material for: A mex3 homolog is required for differentiation during planarian stem cell lineage development
Source: eLife. 2015 Jun 26;4:e07025. doi: 10.7554/eLife.07025 (PMC4507787; doi:10.7554/eLife.07025)
Supplement: Supplementary file 2. — Established stem cell and progeny genes, and genes characterized in this study. Tab 1–2, listing of 59 verified neoblast-specific genes (Known stem cell genes) and five established postmitotic progeny genes previously shown to be enriched in the X2 FACS gate (Known X2 epithelial progenitor genes) used in Figure 1, Figure 7, and Figure 7—figure supplement 1. Tab 3, annotation of the top 100 X2-enriched genes chosen for expression analysis and RNA interference (RNAi) screening in this study. Tab 4, a total of 66 transcripts were identified as WThighXlow, which are irradiation-sensitive transcripts with low expression in both the X1 and X2 irradiation-sensitive FACS gates. Tab 5, epithelial progenitor markers identified in this study. DOI: http://dx.doi.org/10.7554/eLife.07025.024 [file elife07025s002.xlsx]

## Sheet: Known stem cell genes
Gene name	Transcript	Published in
Smed-piwi-1, smedwi-1	SmedASXL_008653	Reddien, 2005
Smed-Bruli, Category 1 H.56.5g	SmedASXL_009464	Guo, 2006, Eisenhoffer, 2008
Smed-PCNA	SmedASXL_002240	Pearson, 2010
Smed-CyclinB2	SmedASXL_013627	Reddien, 2005
Smed-CyclinD2	SmedASXL_010420	Zhu, 2012
Smed-soxP-2	SmedASXL_013986	van Wolfswinkel, 2014
RRM2B, Category 1 H.39.11e	SmedASXL_009993	Eisenhoffer, 2008
Smed-mcm5	SmedASXL_012139	Zeng, 2013
Smedinx-11	SmedASXL_006972	Oviedo, 2007
Smed-mcm2	SmedASXL_014198	van Wolfswinkel, 2014
Smed-piwi-3	SmedASXL_002725	Palakodeti, 2008
Rb, Retinoblastoma	SmedASXL_016270	Zhu, 2011
Smed-piwi-2, smedwi-2	SmedASXL_018810	Reddien, 2005
H2A	SmedASXL_004713	Labbe, 2012
H2B	SmedASXL_002319	Solana, 2012
Category 1 H.48.9h	SmedASXL_006949	Eisenhoffer, 2008
Smed-zfp-1	SmedASXL_001731	Wagner, 2012
Smed-mll12	SmedASXL_018236	Hubert, 2012, Wernermoser, 2012
Smed-fhl-1	SmedASXL_003476	van Wolfswinkel, 2014
Smed-rfx7	SmedASXL_012986	van Wolfswinkel, 2014
Smed-hsp60	SmedASXL_008182	Fernandez-Toboada, 2011
EZH1	SmedASXL_013155	Wagner, 2012
Category 1 H.50.4d(T3)	SmedASXL_005800	Eisenhoffer, 2008
Smed-vasa-1	SmedASXL_006346	Wagner, 2012
Category 1 NB.32.8d, Prohibitin	SmedASXL_004762	Eisenhoffer, 2008
HDAC1, Category 1 H.9.4h(T3)	SmedASXL_004281	Eisenhoffer, 2008
Category 1 NB.15.8c(T3), Smed-HP1-1	SmedASXL_004476	Eisenhoffer, 2008, Zeng, 2103
Smed-oltud-2, TDRD1	SmedASXL_015435	Solana, 2009
Smed-vasa-2, VASA	SmedASXL_006546	van Wolfswinkel, 2014
Smed-fgfr-4	SmedASXL_016233	van Wolfswinkel, 2014
Smed-splicing factor 3B	SmedASXL_015812	Fernandez-Toboada, 2011
Smed-BRG1L	SmedASXL_011257	Onal, 2012
Smed-wdr82-2	SmedASXL_008379	Hubert, 2012
Suz12-1	SmedASXL_011790	Wagner, 2012
Smed-hsp40	SmedASXL_009501	Fernandez-Toboada, 2011
Smed-hcf1	SmedASXL_015073	Hubert, 2012
Category 1 NB.10.4b	SmedASXL_008351	Eisenhoffer, 2008
Category 1 H.8.11d	SmedASXL_002826	Eisenhoffer, 2008
Smed-tud-1, oltud-1	SmedASXL_006995	Solana, 2009, Solana, 2013
Smed-SPT16	SmedASXL_016968	Zeng, 2013
Smed-MBD23	SmedASXL_010939	Jaber-Hijazi, 2013
Smed-armc1	SmedASXL_009067	van Wolfswinkel, 2014
Smed-HP1-2	SmedASXL_009807	Zeng, 2013
Smed-not6	SmedASXL_017262	Solana, 2013
Smed-H3, Histone H3	SmedASXL_003772	Zeng, 2013
Smed-egfr-3	SmedASXL_000685	Fraguas, 2011
Smed-prox-1	SmedASXL_010375	van Wolfswinkel, 2014
Smed-SmB	SmedASXL_002760	Fernandez-Taboada, 2010
Smed-KHD-1	SmedASXL_003885	Wagner, 2012
Smed-tdrd1l2	SmedASXL_003070	van Wolfswinkel, 2014
Smed-ash2-like	SmedASXL_012878	Hubert, 2012
Category 1 H.22.5f	SmedASXL_006537	Eisenhoffer, 2008
Smed-pbx-1	SmedASXL_010830	Blassberg, 2013
Smed-med14	SmedASXL_014533	Burrows, 2015
Smed-soxP-5	SmedASXL_012220	van Wolfswinkel, 2014
HSC70IP	SmedASXL_018786	Wernermoser, 2012
Smed-soxB-1	SmedASXL_010283	Lapan, 2012
Smed-msh6	SmedASXL_013065	Hollenbach, 2011
Smed-mll5-2	SmedASXL_010211	Hubert, 2012

## Sheet: Known X2 epi. progenitor genes
Gene name	Transcript	Published in
prog-1, Category 2 NB.21.11e	SmedASXL_011484	Eisenhoffer, 2008
prog-2, Category 2 NB.32.1g	SmedASXL_073532	Eisenhoffer, 2008
AGAT-1, Category 3 NB.8.8b	SmedASXL_002889	Eisenhoffer, 2008
AGAT-2, Category 3 H.56.4h	SmedASXL_018741	Eisenhoffer, 2008
Smed-p53	SmedASXL_008454	Pearson, 2010

## Sheet: Top 100 X2-enriched
Clone	Transcript Identity	Best BLASTx in Drosophila melanogaster	e score	Best BLASTx in Mus musculus	e score
ANM8-1	SmedASXL_019047	Q9VGW7_DROME_Arginine_methyltransferase_1	3e-44	ANM8_MOUSE_Protein_arginine_N-methyltransferase_8	2e-47
brg1-1	SmedASXL_011257	M9PFS6_DROME_Brahma,_isoform_E	8e-54	F2Z4A9_MOUSE_Probable_global_transcription_activator_SNF2L2	3e-54
CPT1-M	SmedASXL_013318	Q7JQH9_DROME_LD31742p	4e-96	CPT1A_MOUSE_Carnitine_O-palmitoyltransferase_1,_liver_isoform	2e-104
DCOR-1	SmedASXL_012089	DCOR2_DROME_Ornithine_decarboxylase_2	7e-36	DCOR_MOUSE_Ornithine_decarboxylase	6e-48
DDOST	SmedASXL_018795	OST48_DROME_Dolichyl-diphosphooligosaccharide--protein_glycosyltransferase_48_kDa_subunit	6e-138	OST48_MOUSE_Dolichyl-diphosphooligosaccharide--protein_glycosyltransferase_48_kDa_subunit	3e-143
DHX8-1	SmedASXL_004594	A1Z9L3_DROME_FI05376p	4e-67	A2A4N9_MOUSE_ATP-dependent_RNA_helicase_DHX8_(Fragment)	1e-65
DOK3	SmedASXL_013920	Q9W3R6_DROME_Downstream_of_kinase	5e-08	DOK3_MOUSE_Docking_protein_3	8e-12
DRP-2	SmedASXL_006380	Q8IPQ2_DROME_Collapsin_response_mediator_protein	3e-155	DPYL2_MOUSE_Dihydropyrimidinase-related_protein_2	1e-164
egr-1	SmedASXL_008042	Q9VED3_DROME_Stripe,_isoform_A	3e-25	D3Z3K7_MOUSE_E3_SUMO-protein_ligase_EGR2	2e-25
egr-4	SmedASXL_019323	KRUP_DROME_Protein_krueppel	2e-22	EGR4_MOUSE_Early_growth_response_protein_4	9e-23
ENPP6-1	SmedASXL_002004	#NA	#NA	ENPP6_MOUSE_Ectonucleotide_pyrophosphatase/phosphodiesterase_family_member_6	4e-44
ERCC-1	SmedASXL_014426	Q7KMG7_DROME_Ercc1	1e-05	ERCC1_MOUSE_DNA_excision_repair_protein_ERCC-1	5e-12
fukutin-related-1	SmedASXL_013538	Q8IRP4_DROME_CG32719	3.8	FKRP_MOUSE_Fukutin-related_protein	0.0002
G2ME3-ligase	SmedASXL_016302	Q9W5W9_DROME_LD43541p	7e-29	E9Q7E5_MOUSE_G2/M_phase-specific_E3_ubiquitin-protein_ligase	8e-36
GATAD2A	SmedASXL_011816	M9PET3_DROME_Simjang,_isoform_D	1e-14	E9QMN5_MOUSE_Transcriptional_repressor_p66_alpha	5e-16
GFTII-I	SmedASXL_012843	Q9VEL7_DROME_Beat-IIb,_isoform_A	1	GT2D2_MOUSE_General_transcription_factor_II-I_repeat_domain-containing_protein_2	1e-19
H1-gamma	SmedASXL_006919	Q4ABD8_DROME_Histone_H1	8e-12	H1FOO_MOUSE_Histone_H1oo	2e-05
HNRPK-1	SmedASXL_014161	E1JGN7_DROME_Bancal,_isoform_E	1e-17	B2M1R6_MOUSE_Heterogeneous_nuclear_ribonucleoprotein_K	3e-21
HSC71P	SmedASXL_013802	HSP7D_DROME_Heat_shock_70_kDa_protein_cognate_4	0	HSP7C_MOUSE_Heat_shock_cognate_71_kDa_protein	0
mab3	SmedASXL_003739	Q9VAI8_DROME_Doublesex-Mab_related_99B	1e-07	DMRT1_MOUSE_Doublesex-_and_mab-3-related_transcription_factor_1	3e-08
mex3-1	SmedASXL_011384	Q9V4F3_DROME_CG11360,_isoform_A	6e-13	D3YTR3_MOUSE_RNA-binding_protein_MEX3D	3e-15
myb-1	SmedASXL_005044	#NA	#NA	#NA	#NA
NF-YA	SmedASXL_004386	Q9VSY9_DROME_LD21748p	1e-18	F7DFJ2_MOUSE_Nuclear_transcription_factor_Y_subunit_alpha_(Fragment)	1e-21
nicalin	SmedASXL_006355	Q9VKZ7_DROME_CG4972	3e-52	D3YU17_MOUSE_Nicalin	1e-98
NLK	SmedASXL_005509	Q8IQ91_DROME_Nemo,_isoform_E	8e-115	NLK_MOUSE_Serine/threonine-protein_kinase_NLK	1e-112
NR2E1	SmedASXL_013264	TLL_DROME_Protein_tailless	4e-43	NR2E1_MOUSE_Nuclear_receptor_subfamily_2_group_E_member_1	5e-53
NUCB1-1	SmedASXL_019713	Q9VVK7_DROME_NUCB1	2e-29	NUCB1_MOUSE_Nucleobindin-1	1e-34
NUCB1-2	SmedASXL_019494	Q9VVK7_DROME_NUCB1	7e-38	NUCB1_MOUSE_Nucleobindin-1	1e-39
orthopedia	SmedASXL_009406	OTP_DROME_Homeobox_protein_orthopedia	3e-35	OTP_MOUSE_Homeobox_protein_orthopedia	8e-33
OTX2-1	SmedASXL_013104	M9PGZ9_DROME_Ocelliless,_isoform_E	2e-16	D3YZ94_MOUSE_Homeobox_protein_OTX2_(Fragment)	9e-15
pannexin-2-1	SmedASXL_015206	INX3_DROME_Innexin_inx3	3e-16	PANX2_MOUSE_Pannexin-2	3e-08
PDI-1	SmedASXL_013564	PDI_DROME_Protein_disulfide-isomerase	6e-36	PDIA1_MOUSE_Protein_disulfide-isomerase	1e-24
pim3-1	SmedASXL_019309	Q95SH0_DROME_CG3105	2e-35	PIM3_MOUSE_Serine/threonine-protein_kinase_pim-3	3e-58
pmp-8	SmedASXL_009939	#NA	#NA	#NA	#NA
pmp-9	SmedASXL_003039	#NA	#NA	#NA	#NA
pmp-10	SmedASXL_005341	#NA	#NA	#NA	#NA
pmp-11	SmedASXL_009684	#NA	#NA	#NA	#NA
prog-1-1	SmedASXL_013664	#NA	#NA	#NA	#NA
prog-1-2	SmedASXL_008207	#NA	#NA	#NA	#NA
prog-1-3	SmedASXL003799	#NA	#NA	#NA	#NA
prog-1-4	SmedASXL_005723	#NA	#NA	#NA	#NA
prog-1-5	SmedASXL_004473	#NA	#NA	#NA	#NA
prog-1-6	SmedASXL_005223	#NA	#NA	#NA	#NA
prog-1-7	SmedASXL_003595	#NA	#NA	#NA	#NA
prog-1-8	SmedASXL_009962	#NA	#NA	#NA	#NA
prog-1-9	SmedASXL_013905	#NA	#NA	#NA	#NA
prog-1-10	SmedASXL_002658	#NA	#NA	#NA	#NA
prog-2-2	SmedASXL_008106	#N/A	#N/A	#NA	#NA
prog-2-3	SmedASXL_010535	#NA	#NA	#NA	#NA
prog-2-4	SmedASXL_010536	#NA	#NA	#NA	#NA
prog-2-5	SmedASXL_012073	#NA	#NA	#NA	#NA
pmp-1	SmedASXL_012683	#N/A	#N/A	#NA	#NA
pmp-3	SmedASXL_013084	#NA	#NA	#NA	#NA
pmp-4	SmedASXL_002169	#NA	#NA	#NA	#NA
pmp-5	SmedASXL_018040	#NA	#NA	#NA	#NA
pmp-6	SmedASXL_018710	#NA	#NA	#NA	#NA
pmp-7	SmedASXL_006858	#NA	#NA	#NA	#NA
prog-2-6	SmedASXL_004274	#NA	#NA	#NA	#NA
PTBP3-1	SmedASXL_010766	Q95UI6_DROME_Hephaestus	4e-47	G3UXA6_MOUSE_Polypyrimidine_tract-binding_protein_3	5e-45
RNF38	SmedASXL_004947	Q8SX72_DROME_LD30050p	3e-19	Q3UH35_MOUSE_RING_finger_protein_38	5e-20
RPC2	SmedASXL_006583	RPC2_DROME_DNA-directed_RNA_polymerase_III_subunit_RPC2	0	RPC2_MOUSE_DNA-directed_RNA_polymerase_III_subunit_RPC2	0
RREB1	SmedASXL_009248	Q9W4J1_DROME_Pebbled,_isoform_A	9e-16	RREB1_MOUSE_Ras-responsive_element-binding_protein_1	4e-14
runx2	SmedASXL_011806	Q27J10_DROME_Lozenge_splice_variant	4e-36	F8WHN7_MOUSE_Runt-related_transcription_factor_2	1e-33
SCAMP1	SmedASXL_009869	Q9VXV6_DROME_RH68403p	3e-08	Q3TSA8_MOUSE_Secretory_carrier-associated_membrane_protein_1	5e-11
SmedASXL_001324	SmedASXL_001324	#NA	#NA	#NA	#NA
SmedASXL_003799	SmedASXL_003799	#NA	#NA	#NA	#NA
SmedASXL_004708	SmedASXL_004708	#NA	#NA	#NA	#NA
SmedASXL_006137	SmedASXL_006137	#NA	#NA	#NA	#NA
SmedASXL_008453	SmedASXL_008453	#NA	#NA	#NA	#NA
SmedASXL_009478	SmedASXL_009478	#NA	#NA	#NA	#NA
SmedASXL_009585	SmedASXL_009585	#NA	#NA	#NA	#NA
SmedASXL_010977	SmedASXL_010977	#NA	#NA	#NA	#NA
SmedASXL_013486	SmedASXL_013486	#NA	#NA	#NA	#NA
SmedASXL_015052	SmedASXL_015052	#NA	#NA	#NA	#NA
SmedASXL_017351	SmedASXL_017351	#NA	#NA	#NA	#NA
SmedASXL_017808	SmedASXL_017808	#NA	#NA	#NA	#NA
SmedASXL_018251	SmedASXL_018251	#NA	#NA	#NA	#NA
SmedASXL_018463	SmedASXL_018463	#NA	#NA	#NA	#NA
SmedASXL_019450	SmedASXL_019450	#NA	#NA	#NA	#NA
SmedASXL_019847	SmedASXL_019847	#NA	#NA	#NA	#NA
SmedASXL_051872	SmedASXL_051872	#NA	#NA	#NA	#NA
SmedASXL_052437	SmedASXL_052437	#NA	#NA	#NA	#NA
SmedASXL_063412	SmedASXL_063412	#NA	#NA	#NA	#NA
SmedASXL_068812	SmedASXL_068812	#NA	#NA	#NA	#NA
pmp-2	SmedASXL_072118	#NA	#NA	#NA	#NA
SmedASXL_076291	SmedASXL_076291	#NA	#NA	#NA	#NA
SmedASXL_076427	SmedASXL_076427	#NA	#NA	#NA	#NA
SmedASXL_078413	SmedASXL_078413	#NA	#NA	#NA	#NA
sox9-1	SmedASXL_004704	SOX15_DROME_Putative_transcription_factor_SOX-15	2e-18	SOX9_MOUSE_Transcription_factor_SOX-9	4e-18
SSB4	SmedASXL_006584	GUS_DROME_Protein_gustavus	8e-61	SPSB4_MOUSE_SPRY_domain-containing_SOCS_box_protein_4	3e-59
stripe-1	SmedASXL_015062	Q9VED3_DROME_Stripe,_isoform_A	3e-29	#N/A	#N/A
SVOP-1	SmedASXL_018064	Q8SYM5_DROME_CG4324	3e-31	SVOP_MOUSE_Synaptic_vesicle_2-related_protein	1e-36
SVOP-2	SmedASXL_018063	Q8SYM5_DROME_CG4324	6e-11	SVOP_MOUSE_Synaptic_vesicle_2-related_protein	1e-17
TDP-43	SmedASXL_016365	Q9W1I0_DROME_TBPH,_isoform_A	4e-64	TADBP_MOUSE_TAR_DNA-binding_protein_43	4e-59
tektin-3	SmedASXL_010017	Q8IRZ1_DROME_CG17450,_isoform_B	4e-88	TEKT3_MOUSE_Tektin-3	1e-102
tincar-1	SmedASXL_014184	TINC_DROME_Protein_tincar	7e-06	#NA	#NA
TRAF6-1	SmedASXL_015374	Q9W3I9_DROME_GH01161p	6e-10	TRAF6_MOUSE_TNF_receptor-associated_factor_6	1e-10
XCT-1	SmedASXL_001816	Q9VB75_DROME_GH08870p	2e-80	XCT_MOUSE_Cystine/glutamate_transporter	2e-85
ZFHX3	SmedASXL_016786	L0MLK7_DROME_Zn_finger_homeodomain_2,_isoform_C	6e-27	E9QMD3_MOUSE_Zinc_finger_homeobox_protein_3	2e-23
ZFHX4	SmedASXL_016786	L0MLK7_DROME_Zn_finger_homeodomain_2,_isoform_C	5e-19	E9Q5A7_MOUSE_Zinc_finger_homeobox_protein_4	2e-21

## Sheet: WT-high-X-low
ASXL Name	Control CPM	Irrad CPM	X1 CPM	X2 CPM	X1/Irrad	X2/Irrad	WT/Irrad
SmedASXL_078929	91.0846	1.77384	2.94097	1.26123	1.65797	0.711017	51.3489
SmedASXL_082276	61.1519	1.54641	1.39684	1.60481	0.903276	1.03776	39.5444
SmedASXL_009939	121.807	5.11898	2.29809	6.17375	0.448936	1.20605	23.7952
SmedASXL_081556	36.3422	1.57437	1.63302	1.10745	1.03725	0.703423	23.0836
SmedASXL_016645	405.622	17.981	3.16436	2.24143	0.175984	0.124655	22.5584
SmedASXL_018040	185.791	8.58648	1.40111	8.23657	0.163176	0.959248	21.6376
SmedASXL_009682	398.725	18.4464	11.0668	30.9002	0.599945	1.67513	21.6153
SmedASXL_010882	68.536	3.45141	1.18351	2.78174	0.342905	0.805971	19.8574
SmedASXL_006858	88.067	4.58445	2.72527	7.29969	0.594459	1.59227	19.2099
SmedASXL_009962	183.722	9.88843	1.57882	10.9404	0.159663	1.10638	18.5795
SmedASXL_002794	66.015	3.5729	2.49781	6.91237	0.699098	1.93466	18.4766
SmedASXL_074705	312.719	16.9446	2.84057	1.68664	0.167638	0.099538	18.4553
SmedASXL_003039	105.792	6.26891	3.24481	11.0565	0.517604	1.7637	16.8757
SmedASXL_004096	259.506	17.5217	3.05719	11.9357	0.17448	0.681194	14.8106
SmedASXL_071694	26.567	1.86907	1.98694	3.52221	1.06307	1.88448	14.214
SmedASXL_002658	72.6654	5.31421	1.758	3.11564	0.33081	0.586285	13.6738
SmedASXL_009700	296.552	21.9087	3.12841	14.3795	0.142793	0.656336	13.5358
SmedASXL_002399	93.8165	6.98453	2.64986	7.27648	0.379389	1.0418	13.432
SmedASXL_004691	57.5644	4.34623	2.51046	4.70219	0.577619	1.0819	13.2447
SmedASXL_004080	53.6691	4.10385	2.33562	4.66499	0.569128	1.13673	13.0777
SmedASXL_005341	119.22	9.15466	5.09651	12.3691	0.556712	1.35113	13.0229
SmedASXL_002169	33.8355	2.59859	1.9414	4.4611	0.747097	1.71674	13.0207
SmedASXL_003595	92.3515	7.47318	3.07113	13.132	0.410953	1.75722	12.3577
SmedASXL_019259	25.4934	2.10148	1.28691	3.95125	0.61238	1.88022	12.1311
SmedASXL_051900	36.0586	3.0364	1.70586	3.72595	0.561805	1.2271	11.8755
SmedASXL_013928	39.0137	3.29694	1.88891	3.90707	0.572928	1.18506	11.8333
SmedASXL_002991	84.9199	7.30312	2.50172	5.13264	0.342555	0.702802	11.6279
SmedASXL_004241	646.788	61.9704	5.39019	3.24711	0.08698	0.0523977	10.437
SmedASXL_016647	939.462	91.4604	5.2579	5.00735	0.0574882	0.0547488	10.2718
SmedASXL_046304	162.567	16.1047	3.48088	1.61679	0.21614	0.100392	10.0944
SmedASXL_006360	737.184	73.4335	13.806	9.66634	0.188007	0.131634	10.0388
SmedASXL_009684	900.942	90.4769	9.61623	90.4949	0.106284	1.0002	9.9577
SmedASXL_007110	51.8094	5.37201	1.79357	4.85698	0.333872	0.904127	9.64432
SmedASXL_076835	10.7758	1.19783	1.18228	1.15912	0.98702	0.967685	8.99616
SmedASXL_062885	12.599	1.43609	1.2729	1.31193	0.88637	0.913544	8.77319
SmedASXL_004197	39.1422	4.75425	2.19412	4.10084	0.461507	0.862563	8.2331
SmedASXL_000915	17.1208	2.08075	1.35408	1.94797	0.650764	0.936186	8.22817
SmedASXL_005683	22.8876	2.84481	1.31575	2.24218	0.462509	0.788166	8.0454
SmedASXL_004473	129.576	16.2642	2.87394	11.0358	0.176704	0.678535	7.96698
SmedASXL_077012	15.1	2.02872	1.45958	1.5464	0.719456	0.762252	7.4431
SmedASXL_015314	145.168	19.8681	1.99926	5.11067	0.100627	0.25723	7.30657
SmedASXL_047184	13.8439	1.93825	1.00514	1.07496	0.518582	0.5546	7.14248
SmedASXL_082587	13.116	1.85181	1.33244	1.29869	0.719534	0.701312	7.08282
SmedASXL_052800	8.66102	1.23347	1.01666	1.00551	0.824224	0.815186	7.02168
SmedASXL_005223	20.6694	2.99962	1.5339	3.43801	0.511366	1.14615	6.8907
SmedASXL_075006	18.2059	2.71336	3.18402	3.9726	1.17346	1.46409	6.70971
SmedASXL_070699	7.59937	1.14531	1.01721	1	0.888152	0.873128	6.63522
SmedASXL_005473	27.5188	4.15455	1.98969	7.40541	0.478918	1.78248	6.62377
SmedASXL_016218	9.88774	1.56019	1.12484	1.50461	0.720965	0.964378	6.33754
SmedASXL_070645	7.89415	1.25284	1.53859	1.33397	1.22808	1.06475	6.30099
SmedASXL_077631	7.70923	1.24231	1.02694	1.10501	0.82664	0.88948	6.20559
SmedASXL_016646	533.783	91.6301	4.3756	3.04565	0.0477529	0.0332386	5.82541
SmedASXL_007083	27.7615	4.77603	1.59609	7.59099	0.334187	1.58939	5.81268
SmedASXL_003907	28.9496	5.03975	1.46883	3.6772	0.291449	0.72964	5.74425
SmedASXL_034206	21.2747	3.72074	1.56546	5.90396	0.420738	1.58677	5.71788
SmedASXL_004777	11.7621	2.07259	1.24577	3.53204	0.601067	1.70416	5.67506
SmedASXL_065575	33.0893	5.92511	1.5489	4.69444	0.261413	0.792295	5.58459
SmedASXL_002064	21.6902	3.89399	1.46999	4.0699	0.377502	1.04518	5.57018
SmedASXL_004193	60.8007	10.9345	1.66714	3.58053	0.152466	0.327451	5.56042
SmedASXL_013255	46.3923	8.36422	1.85101	11.7929	0.2213	1.40993	5.54651
SmedASXL_079556	13.418	2.48617	1.1434	2.15821	0.459905	0.868086	5.39705
SmedASXL_004429	30.2799	5.72695	1.38328	1.60782	0.241538	0.280746	5.28726
SmedASXL_008128	40.9599	7.78717	2.08079	7.43546	0.267208	0.954835	5.25992
SmedASXL_064229	9.73834	1.85587	1.02235	1.01998	0.550873	0.549596	5.24731
SmedASXL_002002	23.8605	4.59036	1.42346	3.52097	0.310097	0.767035	5.19796
SmedASXL_040563	5.91053	1.16077	1	1.08698	0.861501	0.936435	5.09192

## Sheet: New epi. progenitor genes
Genes identified and cloned through X2 enrichment
gene name	transcript
DCOR-1	SmedASXL_012089
egr-1	SmedASXL_008042
pmp-1	SmedASXL_012683
pmp-10	SmedASXL_005341
pmp-11	SmedASXL_009684
pmp-2	SmedASXL_072118
pmp-3	SmedASXL_013084
pmp-4	SmedASXL_002169
pmp-5	SmedASXL_018040
pmp-6	SmedASXL_018710
pmp-7	SmedASXL_006858
pmp-8	SmedASXL_009939
pmp-9	SmedASXL_003039
prog-1-1	SmedASXL_013664
prog-1-10	SmedASXL_002658
prog-1-2	SmedASXL_008207
prog-1-3	SmedASXL_003799
prog-1-4	SmedASXL_005723
prog-1-5	SmedASXL_004473
prog-1-6	SmedASXL_005223
prog-1-7	SmedASXL_003595
prog-1-8	SmedASXL_009962
prog-1-9	SmedASXL_013905
prog-2-1	SmedASXL_014068
prog-2-2	SmedASXL_008106
prog-2-3	SmedASXL_010535
prog-2-4	SmedASXL_010536
prog-2-5	SmedASXL_012073
RPC-2	SmedASXL_006583
SLC7a11	SmedASXL_001816
sox9-1	SmedASXL_004704
SV2-RP	SmedASXL_018064
