# Supplementary material for: A mex3 homolog is required for differentiation during planarian stem cell lineage development
Source: eLife. 2015 Jun 26;4:e07025. doi: 10.7554/eLife.07025 (PMC4507787; doi:10.7554/eLife.07025)
Supplement: Supplementary file 3. — Cell counts for co-localization of identified progeny markers with established epithelial progenitor genes. Total cell counts for established lineage markers piwi-1, prog-1, prog-2, and AGAT-1, and new progeny markers identified in this study are shown. All counts were performed in 3–4 animals at multiple body regions (head, pre-pharyngeal, tail). DOI: http://dx.doi.org/10.7554/eLife.07025.025 [file elife07025s003.xlsx]

## Sheet: Related to Figure 2B
Cell type	Count
piwi-1+/prog-1+	27
Total piwi-1+	538
Total prog-1+	365
% of piwi-1+ cells that are prog-1+	0.0539588
StDev	0.0274251
% of prog-1+ cells that are piwi-1+	0.0721103
StDev	0.0213513
piwi-1+/prog-2+	30
Total piwi-1+	635
Total prog-2+	485
% of piwi-1+ cells that are prog-2+	0.0477515
StDev	0.00776404
% of prog-2+ cells that are piwi-1+	0.0616049
StDev	0.0115029
piwi-1+/AGAT-1+	1
Total piwi-1+	530
Total AGAT-1+	346
% of piwi-1+ cells that are AGAT-1+	0.00182149
StDev	0.00315492
% of AGAT-1+ cells that are piwi-1+	0.00289855
StDev	0.00502044
prog-1+/prog-2+	502
Total prog-1+	512
Total prog-2+	554
% of prog-1+ cells that are prog-2+	0.976924
StDev	0.0217437
% of prog-2+ cells that are prog-1+	0.920074
StDev	0.103898
prog-1+/AGAT-1+	27
Total prog-1+	477
Total AGAT-1+	541
% of prog-1+ cells that are AGAT-1+	0.0541632
StDev	0.0240571
% of AGAT-1+ cells that are prog-1+	0.051593
StDev	0.0319645
prog-2+/AGAT-1+	22
Total prog-2+	656
Total AGAT-1+	659
% of prog-2+ cells that are AGAT-1+	0.0364344
StDev	0.0240577
% of AGAT-1+ cells that are prog-2+	0.0348952
StDev	0.0239363

## Sheet: Raw counts from Figure 2B
Cell type	Count		Cell type	Count		Cell type	Count		Cell type	Count		Cell type	Count		Cell type	Count
piwi-1+/PIWI-1+	891		piwi-1+/prog-1-1+	23		piwi-1+/prog-2-3+	3		piwi-1+/egr-1+	566		piwi-1+/sox9-1+	181		piwi-1+/pmp-11+	0
Total piwi-1+	896		Total piwi-1+	807		Total piwi-1+	589		Total piwi-1+	2507		Total piwi-1+	643		Total piwi-1+	495
Total PIWI-1+	1199		Total prog-1-1+	334		Total prog-2-3+	355		Total egr-1+	2062		Total sox9-1+	371		Total pmp-11+	250
% of piwi-1+ cells that are PIWI-1+	0.994694		% of piwi-1+ cells that are prog-1-1+	0.0266204		% of piwi-1+ cells that are prog-2-3+	0.00890018		% of piwi-1+ cells that are egr-1+	0.236335		% of piwi-1+ cells that are sox9-1+	0.280475		% of piwi-1+ cells that are pmp-11+	0
StDev	0.00481722		StDev	0.0461078		StDev	0.010684		StDev	0.0907371		StDev	0.0221757		StDev	0
% of PIWI+ cells that are piwi-1+	0.744641		% of prog-1-1+ cells that are piwi-1+	0.0684524		% of prog-2-3+ cells that are piwi-1+	0.00966538		% of egr-1+ cells that are piwi-1+	0.293676		% of sox9-1+ cells that are piwi-1+	0.49087		% of pmp-11+ cells that are piwi-1+	0
StDev	0.0258757		StDev	0.118563		StDev	0.00798436		StDev	0.118904		StDev	0.0520343		StDev	0
prog-1+/PIWI-1+	63		prog-1+/prog-1-1+	564		prog-1+/prog-2-3+	716		prog-1+/egr-1+	452		prog-1+/sox9-1+	172		prog-1+/pmp-11+	2
Total prog-1+	367		Total prog-1+	564		Total prog-1+	726		Total prog-1+	468		Total prog-1+	182		Total prog-1+	423
Total PIWI-1+	661		Total prog-1-1+	564		Total prog-2-3+	914		Total egr-1+	850		Total sox9-1+	251		Total pmp-11+	364
% of prog-1+ cells that are PIWI-1+	0.178188		% of prog-1+ cells that are prog-1-1+	1		% of prog-1+ cells that are prog-2-3+	0.987672		% of prog-1+ cells that are egr-1+	0.957817		% of prog-1+ cells that are sox9-1'+	0.938825		% of prog-1+ cells that are pmp-11+	0.020175
StDev	0.122047		StDev	0		StDev	0.0127979		StDev	0.0465075		StDev	0.0627091		StDev	0.0323252
% of PIWI+ cells that are prog-1+	0.103702		% of prog-1-1+ cells that are prog-1+	1		% of prog-2-3+ cells that are prog-1+	0.784179		% of egr-1+ cells that are prog-1+	0.548393		% of sox9-1+ cells that are prog-1+	0.682012		% of pmp-11+ cells that are prog-1+	0.0142249
StDev	0.0775643		StDev	0		StDev	0.174386		StDev	0.129686		StDev	0.0299131		StDev	0.0202767
prog-2+/PIWI-1+	32		prog-2+/prog-1-1+	2059		prog-2+/prog-2-3+	1888		prog-2+/egr-1+	884		prog-2+/sox9-1+	398		prog-2+/pmp-11+	6
Total prog-2+	401		Total prog-2+	2274		Total prog-2+	1889		Total prog-2+	942		Total prog-2+	454		Total prog-2+	344
Total PIWI-1+	664		Total prog-1-1+	2110		Total prog-2-3+	1888		Total egr-1+	1179		Total sox9-1+	520		Total pmp-11+	328
% of prog-2+ cells that are PIWI-1+	0.0813047		% of prog-2+ cells that are prog-1-1+	0.908092		% of prog-2+ cells that are prog-2-3+	0.99946		% of prog-2+ cells that are egr-1+	0.951132		% of prog-2+ cells that are sox9-1+	0.879125		% of prog-2+ cells that are pmp-11+	0.0167501
StDev	0.039397		StDev	0.0641023		StDev	0.000935738		StDev	0.0429327		StDev	0.0348313		StDev	0.0130145
% of PIWI+ cells that are prog-2+	0.0475855		% of prog-1-1+ cells that are prog-2+	0.975911		% of prog-2-3+ cells that are prog-2+	1		% of egr-1+ cells that are prog-2+	0.739719		% of sox9-1+ cells that are prog-2+	0.765146		% of pmp-11+ cells that are prog-2+	0.0190955
StDev	0.0201701		StDev	0.00867537		StDev	0		StDev	0.0280751		StDev	0.0260672		StDev	0.0171855
AGAT-1+/PIWI-1+	6		AGAT-1+/prog-1-1+	78		AGAT-1+/prog-2-3+	117		AGAT-1+/egr-1+	101		AGAT-1+/sox9-1+	118		AGAT-1+pmp-11+	582
Total AGAT-1+	429		Total AGAT-1+	256		Total AGAT-1+	448		Total AGAT-1+	291		Total AGAT-1+	438		Total AGAT-1+	742
Total PIWI-1+	770		Total prog-1-1+	198		Total prog-2-3+	509		Total egr-1+	285		Total sox9-1+	610		Total pmp-11+	598
% of AGAT-1+ cells that are PIWI-1+	0.0162136		% of AGAT-1+ cells that are prog-1-1+	0.304811		% of AGAT-1+ cells that are prog-2-3+	0.22957		% of AGAT-1+ cells that are egr-1+	0.344577		% of AGAT-1+ cells that are sox9-1+	0.30487		% of AGAT-1+ cells that are pmp-11+	0.816654
StDev	0.0120743		StDev	0.0250946		StDev	0.185521		StDev	0.0579261		StDev	0.19862		StDev	0.130889
% of PIWI+ cells that are AGAT-1+	0.00848351		% of prog-1-1+ cells that are AGAT-1+	0.411797		% of prog-2-3+ cells that are AGAT-1+	0.226948		% of egr-1+ cells that are AGAT-1+	0.353114		% of sox9-1+ cells that are AGAT-1+	0.211004		% of pmp-11+ cells that are AGAT-1+	0.965604
StDev	0.00673768		StDev	0.0982764		StDev	0.197476		StDev	0.0683207		StDev	0.135289		StDev	0.0495523
