# Supplementary material for: A mex3 homolog is required for differentiation during planarian stem cell lineage development
Source: eLife. 2015 Jun 26;4:e07025. doi: 10.7554/eLife.07025 (PMC4507787; doi:10.7554/eLife.07025)
Supplement: Supplementary file 4. — Transcriptional analysis of mex3-1(RNAi) animals. Raw RNAseq reads of control and mex3-1(RNAi) animals are shown. Best homology to fly and mouse proteins are shown for the top 100 down-regulated genes. The top 21 uncharacterized down-regulated genes chosen for validation by WISH are indicated. DOI: http://dx.doi.org/10.7554/eLife.07025.026 [file elife07025s004.xlsx]

## Sheet: mex3-1(RNAi) and control CPMs
name	control1fd12 CPM +1	Mex31fd12 CPM +1
SmedASXL_033406	1.05807	1.06328
SmedASXL_073187	5.13745	4.51215
SmedASXL_027543	1.37745	1.80684
SmedASXL_079910	1.0871	1.09492
SmedASXL_026494	1.05807	1
SmedASXL_012631	1.23228	1.617
SmedASXL_022727	1.29035	1.28477
SmedASXL_075465	12.6429	11.8845
SmedASXL_064459	1.24679	1.26895
SmedASXL_056763	1	1.04746
SmedASXL_030011	1.17421	1.20567
SmedASXL_044800	1.0871	1.0791
SmedASXL_054311	1	1.01582
SmedASXL_044701	1.04355	1.06328
SmedASXL_039948	1.07259	1.03164
SmedASXL_080425	1.24679	1.17403
SmedASXL_039549	1.10162	1.0791
SmedASXL_016317	1.30486	1.23731
SmedASXL_017593	10.4798	10.081
SmedASXL_002025	4.6003	4.33812
SmedASXL_041523	1.04355	1
SmedASXL_035470	1.10162	1.04746
SmedASXL_031310	1.0871	1.12656
SmedASXL_011503	22.6309	15.2701
SmedASXL_022380	1.21776	1.1582
SmedASXL_014401	6.95211	7.99265
SmedASXL_018495	13.4269	12.9761
SmedASXL_058965	1.05807	1.01582
SmedASXL_010568	16.1561	17.2793
SmedASXL_025138	1.20324	1.20567
SmedASXL_056193	1.46456	1.39551
SmedASXL_042312	1.05807	1.04746
SmedASXL_007210	2.78563	6.03091
SmedASXL_059720	1.07259	1.09492
SmedASXL_060090	1.02903	1.04746
SmedASXL_043202	1.18873	1.31641
SmedASXL_044492	1.0871	1.04746
SmedASXL_012775	16.2287	12.2009
SmedASXL_009070	7.95381	9.16336
SmedASXL_029842	1	1.01582
SmedASXL_008185	2.26301	2.18654
SmedASXL_038281	1.13066	1.14238
SmedASXL_028334	1.0871	1.11074
SmedASXL_067706	1	1.0791
SmedASXL_030615	1.13066	1.12656
SmedASXL_016894	13.993	12.9919
SmedASXL_016762	54.3948	54.4099
SmedASXL_066731	1.30486	1.1582
SmedASXL_066321	1.0871	1.03164
SmedASXL_028355	1.02903	1.18985
SmedASXL_075228	1.15969	1.17403
SmedASXL_059989	1.23228	1.28477
SmedASXL_048730	1.01452	1.03164
SmedASXL_065374	1.17421	1
SmedASXL_026587	1.10162	1.0791
SmedASXL_056166	1.0871	1.14238
SmedASXL_056552	1.02903	1.06328
SmedASXL_015327	87.9735	92.8695
SmedASXL_042946	1.10162	1.1582
SmedASXL_012261	11.4525	12.9128
SmedASXL_047335	1.02903	1.03164
SmedASXL_079670	22.0066	23.5125
SmedASXL_067105	1.01452	1.0791
SmedASXL_042713	1.11614	1.14238
SmedASXL_021788	1.17421	1.20567
SmedASXL_047698	1.05807	1.11074
SmedASXL_079363	1.02903	1.04746
SmedASXL_062913	1.26131	1.18985
SmedASXL_010312	1.69683	1.6961
SmedASXL_056273	1	1
SmedASXL_056793	1.07259	1.14238
SmedASXL_036886	1.17421	1.06328
SmedASXL_075050	1.10162	1.06328
SmedASXL_045885	1.01452	1
SmedASXL_063715	1.40649	1.23731
SmedASXL_018897	95.929	89.9269
SmedASXL_025357	1.49359	1.31641
SmedASXL_008523	1.20324	1.22149
SmedASXL_012912	42.2002	30.695
SmedASXL_032709	1.20324	1.18985
SmedASXL_074096	1.30486	1.26895
SmedASXL_038614	1.01452	1
SmedASXL_009892	51.5785	42.418
SmedASXL_073275	1.10162	1.03164
SmedASXL_041147	1.02903	1.0791
SmedASXL_081955	1.07259	1.11074
SmedASXL_063510	1.05807	1.04746
SmedASXL_055706	1.10162	1.01582
SmedASXL_002646	1.3339	1.25313
SmedASXL_053017	4.57127	4.33812
SmedASXL_015868	99.6744	157.037
SmedASXL_076084	1.20324	1.12656
SmedASXL_044835	1.02903	1.0791
SmedASXL_048345	1.02903	1.03164
SmedASXL_064017	1.11614	1.0791
SmedASXL_003296	259.583	227.913
SmedASXL_003135	1	1.01582
SmedASXL_065484	1.11614	1.06328
SmedASXL_058181	1.04355	1.06328
SmedASXL_066376	1.21776	1.14238
SmedASXL_041856	1.01452	1.03164
SmedASXL_008716	47.6443	43.4463
SmedASXL_078399	1.11614	1.18985
SmedASXL_034823	1.20324	1.22149
SmedASXL_046345	1.04355	1.03164
SmedASXL_008782	4.01961	4.27484
SmedASXL_071766	10.5379	9.16336
SmedASXL_008433	4.19382	5.66704
SmedASXL_071624	3.01791	3.32561
SmedASXL_065845	1.02903	1.04746
SmedASXL_056001	1.11614	1.0791
SmedASXL_008594	28.0023	27.7682
SmedASXL_057025	1	1
SmedASXL_038824	1.02903	1.06328
SmedASXL_073136	1.17421	1.1582
SmedASXL_052764	1.11614	1.12656
SmedASXL_065388	1.20324	1.22149
SmedASXL_042075	1.11614	1.0791
SmedASXL_028765	1.13066	1
SmedASXL_064813	1.11614	1.14238
SmedASXL_027959	1.05807	1.06328
SmedASXL_076076	1.0871	1.0791
SmedASXL_063528	1.10162	1.12656
SmedASXL_070483	1.14517	1.28477
SmedASXL_021329	1.14517	1.1582
SmedASXL_018472	24.4891	22.8323
SmedASXL_062311	1.3339	1.63282
SmedASXL_057778	1.02903	1.03164
SmedASXL_040332	1.23228	1.20567
SmedASXL_009845	158.005	133.228
SmedASXL_024105	1.14517	1.09492
SmedASXL_053424	1.11614	1.22149
SmedASXL_005066	1	1.01582
SmedASXL_044747	1.05807	1.03164
SmedASXL_048211	1.13066	1.11074
SmedASXL_055373	1.18873	1.17403
SmedASXL_024491	1.36293	1.52208
SmedASXL_037345	1.01452	1.03164
SmedASXL_016067	12.9623	16.8521
SmedASXL_068802	1.74038	1.88595
SmedASXL_016567	54.3222	61.7823
SmedASXL_082353	1.01452	1.09492
SmedASXL_065295	1.11614	1.22149
SmedASXL_024340	1.02903	1.0791
SmedASXL_007450	3.4244	4.02171
SmedASXL_000865	1.11614	1.09492
SmedASXL_064178	1	1.03164
SmedASXL_050794	1.17421	1.12656
SmedASXL_071438	1.36293	1.37969
SmedASXL_021391	1.01452	1
SmedASXL_022338	1.05807	1.06328
SmedASXL_031914	1.01452	1.01582
SmedASXL_017572	10.9154	11.2675
SmedASXL_011846	1.36293	1.17403
SmedASXL_077070	1.84201	1.82266
SmedASXL_017717	1.39197	1.5379
SmedASXL_077912	1.14517	1.14238
SmedASXL_078109	3.11953	2.78771
SmedASXL_024401	1.10162	1.12656
SmedASXL_031763	1.05807	1.04746
SmedASXL_002901	349.17	335.255
SmedASXL_022711	1.13066	1.0791
SmedASXL_047254	1.07259	1.03164
SmedASXL_067926	1.13066	1.1582
SmedASXL_082368	1.07259	1.04746
SmedASXL_022785	1.07259	1.1582
SmedASXL_044032	1.07259	1.04746
SmedASXL_030411	1.36293	1.50626
SmedASXL_076738	2.43722	2.43966
SmedASXL_063986	1.17421	1.25313
SmedASXL_040052	1.07259	1.0791
SmedASXL_022275	1.04355	1.09492
SmedASXL_003434	1	1
SmedASXL_047819	1.01452	1
SmedASXL_012321	45.9748	48.2083
SmedASXL_058116	1.55166	1.85431
SmedASXL_064716	1.31938	1.28477
SmedASXL_006467	19.9597	22.7215
SmedASXL_025523	1.31938	1.30059
SmedASXL_060928	1.14517	1.09492
SmedASXL_083052	1.17421	1.14238
SmedASXL_074168	1.81297	2.234
SmedASXL_065261	3.65668	3.45217
SmedASXL_021104	1.40649	1.33223
SmedASXL_014813	11.467	10.8087
SmedASXL_047912	1.05807	1.01582
SmedASXL_052503	1.05807	1.06328
SmedASXL_029673	1.01452	1
SmedASXL_017435	32.9237	34.8242
SmedASXL_065890	2.5098	2.4713
SmedASXL_032343	1.01452	1.14238
SmedASXL_060371	1.04355	1.09492
SmedASXL_048449	1.20324	1.22149
SmedASXL_057923	1.07259	1.11074
SmedASXL_036169	1.01452	1.03164
SmedASXL_009608	1.05807	1.0791
SmedASXL_046773	1.04355	1.04746
SmedASXL_046769	1.05807	1.0791
SmedASXL_040580	1.10162	1.04746
SmedASXL_027939	1.01452	1.01582
SmedASXL_061629	1.27583	1.14238
SmedASXL_015791	5.23907	5.69868
SmedASXL_079522	1.07259	1.17403
SmedASXL_076377	1.3339	1.30059
SmedASXL_063865	1.39197	1.45879
SmedASXL_060632	1.01452	1.06328
SmedASXL_033557	1.01452	1.06328
SmedASXL_031235	1.0871	1.11074
SmedASXL_048731	1.07259	1.03164
SmedASXL_076816	3.46795	3.5471
SmedASXL_004901	1.04355	1.20567
SmedASXL_082386	1.11614	1.11074
SmedASXL_078486	2.94533	2.42384
SmedASXL_071940	1.36293	1.26895
SmedASXL_076998	1.87104	1.96505
SmedASXL_006115	97.9614	97.7264
SmedASXL_025321	1.63876	1.79102
SmedASXL_021163	1.10162	1.18985
SmedASXL_022734	1.10162	1.04746
SmedASXL_017618	93.882	91.7779
SmedASXL_016059	11.3364	11.2517
SmedASXL_083419	1.05807	1.12656
SmedASXL_076534	1.13066	1.26895
SmedASXL_015267	10.7992	11.5523
SmedASXL_074531	2.30656	2.3922
SmedASXL_031432	1.0871	1.09492
SmedASXL_072192	1.87104	1.55372
SmedASXL_013004	3.90347	4.2432
SmedASXL_020918	1.02903	1
SmedASXL_072658	2.0017	2.17072
SmedASXL_072042	1.52262	1.44297
SmedASXL_064320	1.26131	1.23731
SmedASXL_005270	1.01452	1.03164
SmedASXL_065116	1.56618	1.55372
SmedASXL_025293	1.20324	1.1582
SmedASXL_059325	1.50811	1.617
SmedASXL_022177	1.04355	1.04746
SmedASXL_073702	1.52262	1.75938
SmedASXL_024316	1.04355	1.01582
SmedASXL_008329	107.006	111.633
SmedASXL_057716	1.36293	1.83849
SmedASXL_009752	6.29883	5.52466
SmedASXL_038516	1.01452	1.01582
SmedASXL_020173	1.29035	1.11074
SmedASXL_013584	2.13235	1.85431
SmedASXL_058115	1.17421	1.12656
SmedASXL_049293	1	1
SmedASXL_001663	1.10162	1.12656
SmedASXL_045860	1.0871	1.06328
SmedASXL_065784	1.34842	1.20567
SmedASXL_077631	5.70362	1.26895
SmedASXL_006586	19.2773	21.6774
SmedASXL_012870	115.905	117.122
SmedASXL_016666	26.6667	28.7175
SmedASXL_045503	1.92911	1.34805
SmedASXL_028871	1.13066	1.22149
SmedASXL_068907	1.52262	1.26895
SmedASXL_006951	12.0622	11.22
SmedASXL_060903	1.0871	1.06328
SmedASXL_014367	41.7357	47.7811
SmedASXL_000016	1.63876	1.74356
SmedASXL_061344	1.79845	1.83849
SmedASXL_081052	1.01452	1.01582
SmedASXL_027423	1.0871	1.11074
SmedASXL_024796	1.11614	1.09492
SmedASXL_011751	3.0905	3.0092
SmedASXL_014306	8.01188	7.23327
SmedASXL_032541	1.01452	1.01582
SmedASXL_065929	2.5098	2.64533
SmedASXL_083036	1.39197	1.31641
SmedASXL_039693	1.17421	1.12656
SmedASXL_078406	2.77112	2.29728
SmedASXL_049136	1.14517	1.09492
SmedASXL_030345	1.05807	1.03164
SmedASXL_075408	3.01791	3.05666
SmedASXL_082509	1.04355	1.12656
SmedASXL_004301	21.9631	23.6391
SmedASXL_008459	30.296	25.3952
SmedASXL_075413	1.15969	1.04746
SmedASXL_066450	1.17421	1.12656
SmedASXL_013578	5.05034	4.46468
SmedASXL_022821	1.05807	1.01582
SmedASXL_012606	2.19042	2.4713
SmedASXL_059367	1	1
SmedASXL_008930	104.959	107.029
SmedASXL_027879	1.01452	1
SmedASXL_063938	1.26131	1.30059
SmedASXL_061893	1.18873	1.20567
SmedASXL_082539	1.15969	1.14238
SmedASXL_082987	1.10162	1.14238
SmedASXL_065618	1.24679	1.14238
SmedASXL_082943	1.13066	1.17403
SmedASXL_036232	1.18873	1.17403
SmedASXL_019971	1.02903	1.04746
SmedASXL_023117	1.14517	1.14238
SmedASXL_042039	1.11614	1.11074
SmedASXL_015286	276.714	272.464
SmedASXL_024342	1.04355	1
SmedASXL_023397	1.01452	1
SmedASXL_062848	1.21776	1.12656
SmedASXL_024713	1.05807	1.01582
SmedASXL_058377	1.01452	1.01582
SmedASXL_036755	1.21776	1.23731
SmedASXL_016231	28.641	28.9231
SmedASXL_019976	1	1.01582
SmedASXL_029621	1.3339	1.25313
SmedASXL_006280	1.15969	1.11074
SmedASXL_010659	54.2642	52.9861
SmedASXL_020393	1.20324	1.0791
SmedASXL_050720	1.01452	1.04746
SmedASXL_020296	1.10162	1.03164
SmedASXL_058592	1	1
SmedASXL_077779	1.56618	1.6961
SmedASXL_016587	1.11614	1.22149
SmedASXL_048836	1.04355	1.11074
SmedASXL_007344	1.17421	1.09492
SmedASXL_050591	1.02903	1
SmedASXL_042140	1.10162	1.0791
SmedASXL_048187	1.10162	1.09492
SmedASXL_075517	1.92911	2.02833
SmedASXL_071062	2.05977	1.99669
SmedASXL_031680	1.07259	1.0791
SmedASXL_079372	1.04355	1.11074
SmedASXL_059118	1.02903	1.04746
SmedASXL_029425	1.04355	1.01582
SmedASXL_001044	1.20324	1.06328
SmedASXL_076049	1.3339	1.47461
SmedASXL_033036	1.13066	1.11074
SmedASXL_024277	1.07259	1.1582
SmedASXL_007184	5.12293	4.05335
SmedASXL_073027	3.14857	3.64202
SmedASXL_046718	1.02903	1.03164
SmedASXL_055324	1	1.01582
SmedASXL_068452	1.37745	1.31641
SmedASXL_022969	1.01452	1.01582
SmedASXL_013337	43.652	57.4
SmedASXL_038951	1.10162	1.09492
SmedASXL_063789	1.45004	1.50626
SmedASXL_041099	1.04355	1
SmedASXL_015322	4.25189	4.06917
SmedASXL_030808	1.0871	1.14238
SmedASXL_028175	1.02903	1
SmedASXL_022518	1.24679	1.09492
SmedASXL_014121	6.76339	6.09419
SmedASXL_010402	1.21776	1.1582
SmedASXL_066221	1.04355	1.04746
SmedASXL_045112	1	1.03164
SmedASXL_070541	1.17421	1.14238
SmedASXL_026064	1.05807	1.09492
SmedASXL_076844	1.02903	1.06328
SmedASXL_073143	4.00509	3.48381
SmedASXL_006286	19.9597	21.1395
SmedASXL_057719	1.02903	1.01582
SmedASXL_040658	10.7992	10.081
SmedASXL_062824	2.05977	2.59787
SmedASXL_060031	1.15969	1.1582
SmedASXL_023995	1.15969	1.12656
SmedASXL_001735	4.07768	4.81273
SmedASXL_005219	44.1311	42.8452
SmedASXL_052440	1	1
SmedASXL_081587	1.29035	1.41133
SmedASXL_028016	1.02903	1.14238
SmedASXL_031463	1.02903	1.0791
SmedASXL_005307	1	1
SmedASXL_022305	1.11614	1.06328
SmedASXL_017355	1.34842	1.42715
SmedASXL_079589	1.13066	1.17403
SmedASXL_005350	73.1077	75.5302
SmedASXL_078662	1.13066	1.09492
SmedASXL_024643	1.62425	1.71192
SmedASXL_059956	1.15969	1.06328
SmedASXL_007606	1.17421	1.30059
SmedASXL_027732	1.15969	1.12656
SmedASXL_047847	1.01452	1
SmedASXL_068461	1	1
SmedASXL_063651	1.18873	1.1582
SmedASXL_055702	7.34408	7.7237
SmedASXL_000998	1.56618	1.66446
SmedASXL_051104	1.02903	1
SmedASXL_079344	1.40649	1.30059
SmedASXL_069561	1.01452	1.01582
SmedASXL_058111	1.0871	1.17403
SmedASXL_082186	1.05807	1.01582
SmedASXL_031980	1.10162	1.03164
SmedASXL_077781	1.20324	1.20567
SmedASXL_058559	1.02903	1
SmedASXL_048489	1.05807	1.04746
SmedASXL_075192	1.95815	1.85431
SmedASXL_053265	1.27583	1.18985
SmedASXL_013600	2.77112	1.91759
SmedASXL_021552	1.05807	1.09492
SmedASXL_068852	1.37745	1.25313
SmedASXL_037414	1.01452	1.03164
SmedASXL_076763	1.23228	1.26895
SmedASXL_020052	1.24679	1.20567
SmedASXL_022756	1	1.01582
SmedASXL_024345	1.02903	1.04746
SmedASXL_031107	1.26131	1.30059
SmedASXL_017991	139.525	154.585
SmedASXL_057460	1.46456	1.55372
SmedASXL_001749	1.11614	1.14238
SmedASXL_044917	1.04355	1.0791
SmedASXL_083410	1.05807	1.06328
SmedASXL_062993	1.52262	1.41133
SmedASXL_013235	208.816	169.899
SmedASXL_057118	1.04355	1.01582
SmedASXL_060315	1.18873	1.37969
SmedASXL_026024	1.18873	1.0791
SmedASXL_016171	59.955	62.5416
SmedASXL_028393	1	1
SmedASXL_079249	1.47907	1.45879
SmedASXL_067885	1.04355	1.04746
SmedASXL_014433	39.1806	40.9309
SmedASXL_023885	1.07259	1.18985
SmedASXL_044688	1.01452	1.06328
SmedASXL_025324	2.32108	2.04415
SmedASXL_063572	1.10162	1.14238
SmedASXL_050940	1.05807	1
SmedASXL_024134	1.01452	1.06328
SmedASXL_004571	1.05807	1.03164
SmedASXL_047015	1.24679	1.20567
SmedASXL_067205	1.02903	1.37969
SmedASXL_041174	1.02903	1.09492
SmedASXL_030764	1.02903	1.0791
SmedASXL_066048	1.29035	1.31641
SmedASXL_044069	1.04355	1.06328
SmedASXL_039607	1.10162	1.14238
SmedASXL_033150	1.02903	1.06328
SmedASXL_020787	1.26131	1.30059
SmedASXL_077269	2.95984	2.97756
SmedASXL_082912	1.07259	1.06328
SmedASXL_032945	1.04355	1
SmedASXL_044659	1.01452	1.03164
SmedASXL_031150	1.01452	1.04746
SmedASXL_023946	1.23228	1.1582
SmedASXL_064663	1.56618	1.52208
SmedASXL_077244	1.15969	1.09492
SmedASXL_002694	1.01452	1.03164
SmedASXL_039010	1.01452	1.04746
SmedASXL_043781	1.13066	1.1582
SmedASXL_030294	1.02903	1.01582
SmedASXL_013722	116.253	131.329
SmedASXL_078007	1.17421	1.20567
SmedASXL_048979	1.04355	1.12656
SmedASXL_003020	1.36293	1.42715
SmedASXL_076806	1.20324	1.33223
SmedASXL_075740	1.26131	1.12656
SmedASXL_073035	1.65328	1.72774
SmedASXL_018215	1538	2117.19
SmedASXL_035030	1.15969	1.14238
SmedASXL_059378	1.40649	1.37969
SmedASXL_069712	1.0871	1.01582
SmedASXL_047276	1.11614	1.14238
SmedASXL_036059	1.01452	1.04746
SmedASXL_040091	1.02903	1.06328
SmedASXL_046365	1	1.01582
SmedASXL_061838	1.40649	1.47461
SmedASXL_055722	1.02903	1.03164
SmedASXL_056993	1	1.03164
SmedASXL_058801	1.10162	1.17403
SmedASXL_057372	1.10162	1.0791
SmedASXL_080597	1.0871	1.04746
SmedASXL_052356	1.07259	1.04746
SmedASXL_048561	1.0871	1.11074
SmedASXL_009544	50.1412	42.1807
SmedASXL_041447	1.01452	1.01582
SmedASXL_061352	1.01452	1.06328
SmedASXL_017857	8.27319	9.74872
SmedASXL_037391	1.05807	1.03164
SmedASXL_063095	1.3339	1.45879
SmedASXL_037882	1.13066	1.18985
SmedASXL_064912	1.72587	1.6961
SmedASXL_072585	3.94702	4.65453
SmedASXL_071097	1.49359	1.617
SmedASXL_048357	1.24679	1.26895
SmedASXL_063310	2.82919	2.55041
SmedASXL_031289	1.02903	1.04746
SmedASXL_039907	1.04355	1
SmedASXL_080356	1.15969	1.14238
SmedASXL_039249	1.17421	1.14238
SmedASXL_046546	1	1
SmedASXL_029646	2.29204	2.70861
SmedASXL_061636	1.15969	1.22149
SmedASXL_057359	1.95815	2.17072
SmedASXL_015408	1.46456	1.18985
SmedASXL_006674	21.3678	23.3701
SmedASXL_035613	1.05807	1.14238
SmedASXL_015190	11.6993	13.2609
SmedASXL_017773	3.03243	2.89846
SmedASXL_016572	22.9793	36.5011
SmedASXL_047614	1	1
SmedASXL_074008	2.30656	2.32892
SmedASXL_002789	94.695	84.3739
SmedASXL_071918	1.15969	1.06328
SmedASXL_051723	1.14517	1.1582
SmedASXL_082911	1.04355	1.09492
SmedASXL_077675	2.03073	2.12325
SmedASXL_060834	1.0871	1.04746
SmedASXL_073772	1.05807	1.03164
SmedASXL_069674	2.49529	2.4713
SmedASXL_027014	1.15969	1.0791
SmedASXL_033348	1.01452	1
SmedASXL_069065	1.13066	1.22149
SmedASXL_008781	21.5711	24.8415
SmedASXL_004872	1.13066	1.09492
SmedASXL_080222	1.02903	1.09492
SmedASXL_016758	16.0109	15.9187
SmedASXL_008832	12.8462	13.2925
SmedASXL_047247	1.05807	1.06328
SmedASXL_001224	1.05807	1.09492
SmedASXL_010835	14.5737	16.6781
SmedASXL_031475	1	1.03164
SmedASXL_019888	5.09389	4.30648
SmedASXL_017040	47.8039	51.404
SmedASXL_058671	1.0871	1.04746
SmedASXL_023317	1.01452	1.06328
SmedASXL_028590	1.34842	1.42715
SmedASXL_019066	1.43552	1.42715
SmedASXL_039319	1.02903	1.06328
SmedASXL_078293	1.17421	1.17403
SmedASXL_051007	1.0871	1.04746
SmedASXL_067025	1.07259	1.09492
SmedASXL_060544	1.07259	1.0791
SmedASXL_004460	1.0871	1.0791
SmedASXL_047130	1	1.04746
SmedASXL_068869	1.46456	1.50626
SmedASXL_066829	1.29035	1.1582
SmedASXL_009887	36.6691	37.3396
SmedASXL_078285	1.23228	1.22149
SmedASXL_011025	1.3339	1.41133
SmedASXL_082989	1.40649	1.44297
SmedASXL_080022	1.56618	1.63282
SmedASXL_000347	1.07259	1.03164
SmedASXL_013040	10.8573	5.60376
SmedASXL_076336	1.11614	1.1582
SmedASXL_021341	1.02903	1.17403
SmedASXL_070060	1.15969	1.06328
SmedASXL_051769	1.27583	1.34805
SmedASXL_075979	1.56618	1.6961
SmedASXL_042216	1.18873	1.0791
SmedASXL_008668	1.59521	1.85431
SmedASXL_056297	1.43552	1.45879
SmedASXL_056638	1.15969	1.1582
SmedASXL_030677	1	1
SmedASXL_077913	4.2664	3.92679
SmedASXL_036985	1	1.01582
SmedASXL_017752	104.233	112.787
SmedASXL_053762	1	1
SmedASXL_069710	1.05807	1
SmedASXL_018609	394.87	403.236
SmedASXL_021835	1	1.09492
SmedASXL_019793	1.15969	1.14238
SmedASXL_068376	1.97266	1.93341
SmedASXL_063692	1.02903	1.04746
SmedASXL_037368	1.02903	1.03164
SmedASXL_007398	10.0153	9.76454
SmedASXL_051586	1.0871	1.04746
SmedASXL_054977	1.04355	1.04746
SmedASXL_013697	137.434	124.067
SmedASXL_014902	7.0247	7.59714
SmedASXL_006703	269.484	284.582
SmedASXL_012248	4.91968	5.1766
SmedASXL_032780	1.02903	1.01582
SmedASXL_049910	1.04355	1.04746
SmedASXL_044856	1.01452	1.01582
SmedASXL_041975	1.30486	1.28477
SmedASXL_076727	1.26131	1.44297
SmedASXL_017632	8.1135	6.12583
SmedASXL_038525	1.17421	1.06328
SmedASXL_017578	22.1373	22.4209
SmedASXL_005862	58.271	54.9004
SmedASXL_064730	1.15969	1.36387
SmedASXL_052627	1.24679	1.28477
SmedASXL_062034	1.26131	1.41133
SmedASXL_054234	1	1
SmedASXL_058295	1.02903	1.04746
SmedASXL_076249	1.62425	1.36387
SmedASXL_035290	1.04355	1.01582
SmedASXL_070492	1.97266	1.34805
SmedASXL_071986	1.37745	1.17403
SmedASXL_020323	1.13066	1.01582
SmedASXL_065674	1.7549	1.617
SmedASXL_007183	1.76942	2.04415
SmedASXL_068210	1.30486	1.34805
SmedASXL_042194	1.07259	1.06328
SmedASXL_014457	9.42006	11.3941
SmedASXL_060118	1.01452	1
SmedASXL_080770	1.17421	1.18985
SmedASXL_079335	1.05807	1.03164
SmedASXL_044399	1.05807	1.01582
SmedASXL_048081	1.15969	1.12656
SmedASXL_036964	1.05807	1.03164
SmedASXL_032309	1.07259	1.09492
SmedASXL_058966	1.07259	1.09492
SmedASXL_008054	9.89914	8.83113
SmedASXL_004978	12.5268	12.5964
SmedASXL_052504	1	1.03164
SmedASXL_035261	1	1.01582
SmedASXL_079720	1.05807	1
SmedASXL_052540	1.02903	1.06328
SmedASXL_037164	1.71135	1.90177
SmedASXL_060251	1.10162	1.11074
SmedASXL_082586	1	1.0791
SmedASXL_018779	37.424	32.1822
SmedASXL_036599	1.10162	1.06328
SmedASXL_080275	1	1
SmedASXL_007624	3.25019	3.32561
SmedASXL_070511	1.26131	1.20567
SmedASXL_036484	1.01452	1.01582
SmedASXL_002422	1	1
SmedASXL_002808	1.0871	1
SmedASXL_007271	1.52262	2.70861
SmedASXL_034390	1.43552	1.18985
SmedASXL_022023	1.0871	1.06328
SmedASXL_040283	1.02903	1.04746
SmedASXL_069790	1.13066	1.1582
SmedASXL_003087	25.7376	24.7465
SmedASXL_062711	1.18873	1.1582
SmedASXL_073727	2.71305	2.17072
SmedASXL_034158	1.13066	1.06328
SmedASXL_028158	1.02903	1.1582
SmedASXL_083218	1.14517	1.20567
SmedASXL_038900	1.05807	1.09492
SmedASXL_083086	1.07259	1.23731
SmedASXL_046697	1.02903	1.01582
SmedASXL_025517	1.14517	1.11074
SmedASXL_028063	1.10162	1.14238
SmedASXL_022549	1.05807	1.14238
SmedASXL_027100	1.02903	1.04746
SmedASXL_080781	1.27583	1.33223
SmedASXL_068392	1.02903	1.01582
SmedASXL_061946	1.50811	1.5379
SmedASXL_055471	1	1.04746
SmedASXL_073776	1.0871	1
SmedASXL_063383	1.30486	1.30059
SmedASXL_076211	2.05977	1.98087
SmedASXL_073879	2.53884	2.29728
SmedASXL_077922	2.55336	2.72443
SmedASXL_052805	1.05807	1.03164
SmedASXL_051669	1.52262	1.56954
SmedASXL_057517	1.85652	1.83849
SmedASXL_051536	1.23228	1.20567
SmedASXL_029935	1.21776	1.31641
SmedASXL_045681	1.30486	1.25313
SmedASXL_034664	1.05807	1.11074
SmedASXL_054573	1.02903	1.03164
SmedASXL_043124	1.15969	1.20567
SmedASXL_072374	1.92911	1.7752
SmedASXL_007382	1.10162	1.09492
SmedASXL_030070	1.05807	1.04746
SmedASXL_014584	3.11953	3.0092
SmedASXL_015280	8.33126	8.86278
SmedASXL_069788	1.55166	1.5379
SmedASXL_043443	1.01452	1.11074
SmedASXL_039704	1.18873	1.1582
SmedASXL_024768	1.01452	1.06328
SmedASXL_016624	1.55166	1.33223
SmedASXL_037101	1.01452	1
SmedASXL_071776	1.23228	1.22149
SmedASXL_065940	1.04355	1.04746
SmedASXL_017663	29.9766	32.546
SmedASXL_058060	1.0871	1.0791
SmedASXL_036750	1.01452	1.12656
SmedASXL_047863	1.04355	1.09492
SmedASXL_019183	37.5837	38.8109
SmedASXL_012316	50.9687	41.5637
SmedASXL_066168	1.21776	1.25313
SmedASXL_057753	1	1.01582
SmedASXL_025187	1.07259	1.03164
SmedASXL_002190	1.07259	1.09492
SmedASXL_054572	1.04355	1.03164
SmedASXL_010547	16.0545	16.3459
SmedASXL_080882	1.11614	1.0791
SmedASXL_052526	1.85652	1.82266
SmedASXL_019757	1.0871	1.04746
SmedASXL_017522	1.421	2.17072
SmedASXL_074279	1.31938	1.33223
SmedASXL_034886	1.29035	1.11074
SmedASXL_078087	9.65234	9.90693
SmedASXL_039914	1.13066	1.17403
SmedASXL_068582	1.14517	1.0791
SmedASXL_030512	1.05807	1
SmedASXL_051555	1.0871	1.12656
SmedASXL_030202	1.10162	1.09492
SmedASXL_046482	1.02903	1.06328
SmedASXL_063786	1.11614	1.09492
SmedASXL_035822	1.0871	1.04746
SmedASXL_018161	41.3437	41.1207
SmedASXL_073942	1.97266	1.94923
SmedASXL_015980	2.72756	2.48712
SmedASXL_040175	1.11614	1.09492
SmedASXL_044886	1.60973	1.49043
SmedASXL_006890	28.7136	28.4011
SmedASXL_061481	4.64386	5.05004
SmedASXL_035063	1.05807	1.14238
SmedASXL_065689	1.15969	1.22149
SmedASXL_065087	1.27583	1.22149
SmedASXL_036417	1.21776	1.26895
SmedASXL_038771	1.02903	1.0791
SmedASXL_056454	1.01452	1.01582
SmedASXL_025783	1.07259	1.04746
SmedASXL_068031	1.17421	1.12656
SmedASXL_056902	1.01452	1
SmedASXL_070921	1.01452	1.04746
SmedASXL_003100	62.51	57.226
SmedASXL_074874	1.13066	1.18985
SmedASXL_062802	1.40649	1.50626
SmedASXL_082794	1.36293	1.30059
SmedASXL_072452	1.05807	1.04746
SmedASXL_034428	1.05807	1.01582
SmedASXL_073837	7.50377	9.84364
SmedASXL_015960	16.3448	13.9253
SmedASXL_062874	1.17421	1.22149
SmedASXL_031418	1.05807	1.03164
SmedASXL_004005	2.81467	3.11994
SmedASXL_029369	1.0871	1.01582
SmedASXL_059233	1.04355	1.06328
SmedASXL_056543	1.04355	1.01582
SmedASXL_000166	1.24679	1.41133
SmedASXL_024661	1.94363	1.74356
SmedASXL_059374	1.94363	2.64533
SmedASXL_075036	1.90008	1.7752
SmedASXL_070642	1.11614	1.03164
SmedASXL_027778	1.14517	1.09492
SmedASXL_058285	1.02903	1.09492
SmedASXL_004081	86.4201	81.8268
SmedASXL_020870	1.07259	1.0791
SmedASXL_019363	1	1
SmedASXL_080541	1.20324	1.23731
SmedASXL_006170	1.15969	1.1582
SmedASXL_062017	1.21776	1.30059
SmedASXL_018410	1.3339	1.22149
SmedASXL_015451	4.06316	3.57874
SmedASXL_033301	1.11614	1.11074
SmedASXL_066720	1	1
SmedASXL_057849	1.59521	1.5379
SmedASXL_018830	112.798	127.374
SmedASXL_041481	1.02903	1.06328
SmedASXL_066844	3.14857	3.29397
SmedASXL_016402	64.9489	65.2944
SmedASXL_029049	1.07259	1.12656
SmedASXL_076005	1.49359	1.37969
SmedASXL_078630	1.23228	1.26895
SmedASXL_073657	1.7549	1.71192
SmedASXL_023300	1.04355	1.03164
SmedASXL_047660	1.02903	1.06328
SmedASXL_077102	1.46456	1.52208
SmedASXL_056107	1.10162	1.01582
SmedASXL_034245	1.01452	1.06328
SmedASXL_072891	1.17421	1.33223
SmedASXL_039961	1.01452	1.03164
SmedASXL_013474	66.8943	60.5641
SmedASXL_070475	2.48077	2.21818
SmedASXL_044858	1.10162	1.17403
SmedASXL_021517	1.23228	1.18985
SmedASXL_025962	1.23228	1.25313
SmedASXL_009261	7.01018	5.98345
SmedASXL_069486	30.4702	28.5434
SmedASXL_082761	1.43552	1.42715
SmedASXL_055260	1.02903	1.04746
SmedASXL_025284	1.0871	1.04746
SmedASXL_076916	1.39197	1.39551
SmedASXL_007479	2.55336	3.42053
SmedASXL_062348	2.16139	2.29728
SmedASXL_059730	1.29035	1.36387
SmedASXL_047353	1	1
SmedASXL_048821	1	1
SmedASXL_063821	1.58069	1.39551
SmedASXL_043228	1.14517	1
SmedASXL_048572	1.07259	1.0791
SmedASXL_083175	1.15969	1.12656
SmedASXL_040844	1.0871	1.03164
SmedASXL_038585	1.02903	1.01582
SmedASXL_012498	25.2149	24.4301
SmedASXL_012919	26.4489	24.9838
SmedASXL_075026	3.90347	4.02171
SmedASXL_011294	17.3175	17.6748
SmedASXL_052073	1.18873	1.36387
SmedASXL_020241	1.02903	1.03164
SmedASXL_081655	1.07259	1.0791
SmedASXL_059448	1.05807	1.04746
SmedASXL_030062	1.05807	1.06328
SmedASXL_016077	38.1354	33.0206
SmedASXL_031910	1.01452	1.01582
SmedASXL_049687	1.49359	1.34805
SmedASXL_068364	1.88556	1.99669
SmedASXL_080680	1.07259	1.04746
SmedASXL_036683	1.07259	1.01582
SmedASXL_015107	40.6469	45.946
SmedASXL_054633	1.01452	1.01582
SmedASXL_029546	1.04355	1
SmedASXL_003637	812.97	738.899
SmedASXL_030245	1.07259	1.17403
SmedASXL_045855	1.01452	1
SmedASXL_045325	1	1.01582
SmedASXL_062330	1	1
SmedASXL_011688	13.1655	15.3333
SmedASXL_078995	1.01452	1.04746
SmedASXL_049311	1.30486	1.34805
SmedASXL_007786	1.72587	2.04415
SmedASXL_028015	1.02903	1.01582
SmedASXL_070533	1.24679	1.39551
SmedASXL_049542	1	1.01582
SmedASXL_048127	1.47907	1.5379
SmedASXL_005395	18.0579	18.9404
SmedASXL_081792	1.29035	1.34805
SmedASXL_029552	1.98718	1.68028
SmedASXL_029171	1	1
SmedASXL_073160	1.55166	1.66446
SmedASXL_052948	1.21776	1.12656
SmedASXL_060074	1.15969	1.12656
SmedASXL_018166	21.063	24.1612
SmedASXL_058692	3.1776	3.13576
SmedASXL_044020	1.02903	1.03164
SmedASXL_071143	1.27583	1.14238
SmedASXL_061213	1.11614	1.04746
SmedASXL_082303	1.11614	1.11074
SmedASXL_002942	1.02903	1
SmedASXL_013366	135.373	171.402
SmedASXL_019073	14.3414	12.4698
SmedASXL_071094	1.71135	1.66446
SmedASXL_076959	1.15969	1.17403
SmedASXL_050085	1.01452	1.01582
SmedASXL_073057	1.0871	1.17403
SmedASXL_064363	1.04355	1.01582
SmedASXL_040781	1.05807	1.03164
SmedASXL_007497	53.7561	75.6094
SmedASXL_017848	39.6887	41.0891
SmedASXL_026212	1.31938	1.37969
SmedASXL_031274	1.11614	1.11074
SmedASXL_057755	1.04355	1.09492
SmedASXL_071763	1.74038	1.68028
SmedASXL_051955	1.17421	1.11074
SmedASXL_043501	1.02903	1.0791
SmedASXL_020206	1.02903	1.12656
SmedASXL_044837	1.01452	1.01582
SmedASXL_047394	1.13066	1.11074
SmedASXL_057475	1.72587	1.80684
SmedASXL_065236	1.05807	1.11074
SmedASXL_062911	1.40649	1.30059
SmedASXL_054505	1.04355	1.01582
SmedASXL_032973	1.05807	1.04746
SmedASXL_038548	1.01452	1.01582
SmedASXL_049679	1.0871	1.14238
SmedASXL_066086	1.46456	1.41133
SmedASXL_081460	1.21776	1.18985
SmedASXL_060428	34.7238	34.3654
SmedASXL_006745	21.9195	27.9264
SmedASXL_043256	1.01452	1.01582
SmedASXL_002608	1.69683	1.6961
SmedASXL_074057	1.90008	1.80684
SmedASXL_002071	1.07259	1.14238
SmedASXL_019408	8.72323	8.70457
SmedASXL_014590	36.2481	42.8452
SmedASXL_036351	1.20324	1.17403
SmedASXL_024326	1.10162	1.09492
SmedASXL_015096	14.6318	14.2417
SmedASXL_063012	3.06146	2.64533
SmedASXL_037595	1.04355	1.09492
SmedASXL_042987	1	1
SmedASXL_025173	1.21776	1.36387
SmedASXL_001248	6.56015	6.53717
SmedASXL_044321	1.18873	1.22149
SmedASXL_028592	1.04355	1
SmedASXL_023629	1.05807	1.03164
SmedASXL_024516	1	1
SmedASXL_036140	1.14517	1.11074
SmedASXL_058776	1.3339	1.49043
SmedASXL_019768	1	1
SmedASXL_062478	1	1
SmedASXL_074510	2.4227	2.28146
SmedASXL_037669	1.01452	1.06328
SmedASXL_023333	1.26131	1.30059
SmedASXL_003800	15.256	14.7322
SmedASXL_083447	1.07259	1.17403
SmedASXL_048282	1.0871	1.09492
SmedASXL_079713	1.01452	1
SmedASXL_006947	28.2636	28.1796
SmedASXL_069525	1.0871	1.06328
SmedASXL_027843	1.31938	1.20567
SmedASXL_055939	1.01452	1.0791
SmedASXL_019650	138.32	170.153
SmedASXL_017505	55.5707	62.51
SmedASXL_022877	1.10162	1.03164
SmedASXL_010474	3.11953	3.53128
SmedASXL_025168	1.11614	1.22149
SmedASXL_079737	15.677	17.8013
SmedASXL_033958	1	1.04746
SmedASXL_078881	1.11614	1.12656
SmedASXL_062793	1.23228	1.33223
SmedASXL_000175	1.17421	1.28477
SmedASXL_003747	1.0871	1.09492
SmedASXL_005416	10.6686	6.37896
SmedASXL_065264	1.07259	1.0791
SmedASXL_019166	138.581	147.434
SmedASXL_033796	1.0871	1.12656
SmedASXL_076045	1.02903	1.11074
SmedASXL_081480	1.05807	1.03164
SmedASXL_037438	1.11614	1.12656
SmedASXL_032815	1.01452	1.03164
SmedASXL_054530	2.0888	2.02833
SmedASXL_038838	1.39197	1.31641
SmedASXL_004193	47.412	4.65453
SmedASXL_002729	284.945	269.41
SmedASXL_046800	1.01452	1.04746
SmedASXL_077227	3.16309	2.99338
SmedASXL_061282	3.71474	3.73694
SmedASXL_019602	1.34842	1.52208
SmedASXL_006860	286.527	302.586
SmedASXL_080398	1.01452	1
SmedASXL_023399	1.07259	1.03164
SmedASXL_056429	1	1.03164
SmedASXL_053642	1.45004	1.41133
SmedASXL_024868	1.31938	1.34805
SmedASXL_009303	14.6899	11.3782
SmedASXL_030188	1.11614	1.18985
SmedASXL_041026	1.01452	1.04746
SmedASXL_057533	1.26131	1.33223
SmedASXL_021849	1.0871	1.04746
SmedASXL_038099	1	1.01582
SmedASXL_032926	1.0871	1.06328
SmedASXL_019329	10.6976	12.2484
SmedASXL_005519	3.16309	3.42053
SmedASXL_047437	1.02903	1.04746
SmedASXL_082095	1.15969	1.0791
SmedASXL_006016	21.876	28.2745
SmedASXL_004293	1.07259	1.03164
SmedASXL_066833	1.0871	1.20567
SmedASXL_064236	1.20324	1.20567
SmedASXL_053934	1.02903	1.06328
SmedASXL_045405	1.34842	1.56954
SmedASXL_030903	1.04355	1.01582
SmedASXL_051018	1.10162	1.03164
SmedASXL_064781	1.26131	1.17403
SmedASXL_044426	1.0871	1.04746
SmedASXL_032046	1.11614	1.1582
SmedASXL_077212	1.56618	1.47461
SmedASXL_055182	1.13066	1.06328
SmedASXL_063342	1.37745	1.14238
SmedASXL_070491	1.29035	1.04746
SmedASXL_029451	1.04355	1.06328
SmedASXL_052942	1.02903	1.06328
SmedASXL_022331	1	1
SmedASXL_061656	1.14517	1.17403
SmedASXL_018373	42.8245	40.3297
SmedASXL_075677	1.40649	1.42715
SmedASXL_057644	1.02903	1.03164
SmedASXL_052005	1.05807	1.06328
SmedASXL_075041	1.421	1.37969
SmedASXL_046177	1.17421	1.12656
SmedASXL_009812	5.90686	5.58794
SmedASXL_048686	1.01452	1.01582
SmedASXL_081337	1.10162	2.15489
SmedASXL_059488	1.78394	1.63282
SmedASXL_048398	1.07259	1.09492
SmedASXL_044876	1.02903	1.04746
SmedASXL_042835	1.07259	1.03164
SmedASXL_060308	1.04355	1.03164
SmedASXL_067026	1.34842	1.26895
SmedASXL_035243	1.02903	1.01582
SmedASXL_011644	7.61991	11.7105
SmedASXL_070196	1.36293	1.12656
SmedASXL_081257	1	1.01582
SmedASXL_017106	34.3173	31.4861
SmedASXL_038340	1.04355	1.01582
SmedASXL_030905	1.21776	1.04746
SmedASXL_064368	1.11614	1.17403
SmedASXL_026769	1.15969	1.33223
SmedASXL_063547	2.21946	2.50294
SmedASXL_002559	1.07259	1.03164
SmedASXL_012837	71.9173	73.4103
SmedASXL_052310	1.0871	1.14238
SmedASXL_025055	1.01452	1
SmedASXL_015895	5.61652	5.31899
SmedASXL_079359	1.11614	1.04746
SmedASXL_041930	1.02903	1.03164
SmedASXL_067453	1.21776	1.31641
SmedASXL_040079	1.0871	1.14238
SmedASXL_002784	118.141	134.699
SmedASXL_073043	1.02903	1.01582
SmedASXL_021617	1.02903	1.0791
SmedASXL_063693	1	1.04746
SmedASXL_065889	1.6678	1.55372
SmedASXL_065023	1.10162	1.12656
SmedASXL_035723	1	1.01582
SmedASXL_032655	1.10162	1.11074
SmedASXL_068119	1.04355	1.01582
SmedASXL_030216	1.29035	1.26895
SmedASXL_068594	1.18873	1.28477
SmedASXL_051702	1.07259	1.04746
SmedASXL_070345	2.69853	2.72443
SmedASXL_010493	15.6625	12.723
SmedASXL_006196	4.73096	4.13245
SmedASXL_068263	1.7549	1.72774
SmedASXL_030607	1.11614	1.22149
SmedASXL_028500	1.31938	1.31641
SmedASXL_054670	1.04355	1.0791
SmedASXL_027280	1.18873	1.20567
SmedASXL_026832	1	1
SmedASXL_007792	1.05807	1.14238
SmedASXL_049160	1	1.03164
SmedASXL_079552	1.23228	1.11074
SmedASXL_080633	1.0871	1.11074
SmedASXL_071737	1.24679	1.34805
SmedASXL_067441	2.71305	2.66115
SmedASXL_002665	111.404	88.4714
SmedASXL_081906	1.01452	1
SmedASXL_059026	1.10162	1.0791
SmedASXL_002600	1.04355	1.03164
SmedASXL_033513	1.23228	1.0791
SmedASXL_018932	183.788	204.863
SmedASXL_023368	1.0871	1
SmedASXL_004849	11.9025	11.2517
SmedASXL_067839	1.17421	1.25313
SmedASXL_076486	1.45004	1.44297
SmedASXL_006716	81.1793	66.8923
SmedASXL_033749	1	1.04746
SmedASXL_055376	1.14517	1.11074
SmedASXL_035826	1.02903	1.06328
SmedASXL_076678	1.76942	1.85431
SmedASXL_057511	1.02903	1.01582
SmedASXL_059645	1.0871	1.06328
SmedASXL_030838	1.02903	1.01582
SmedASXL_031881	1.15969	1.17403
SmedASXL_049118	1.18873	1.12656
SmedASXL_058093	1.02903	1.25313
SmedASXL_007288	1.02903	1.04746
SmedASXL_056296	1.02903	1.01582
SmedASXL_035008	1.04355	1.01582
SmedASXL_030023	1	1.01582
SmedASXL_047097	1.02903	1.01582
SmedASXL_016159	14.0221	17.5008
SmedASXL_060824	1.04355	1.04746
SmedASXL_059879	1.05807	1.01582
SmedASXL_057283	1	1
SmedASXL_072552	1.50811	1.42715
SmedASXL_079221	17.9272	21.6774
SmedASXL_022675	1.04355	1.06328
SmedASXL_065253	1.36293	1.36387
SmedASXL_025980	1.01452	1.03164
SmedASXL_015496	13.7462	13.1027
SmedASXL_038457	1.10162	1.12656
SmedASXL_060941	1.10162	1
SmedASXL_061436	1	1.01582
SmedASXL_033562	1.13066	1.30059
SmedASXL_023536	1.01452	1.0791
SmedASXL_070487	1.0871	1.04746
SmedASXL_072623	1.40649	1.25313
SmedASXL_017870	13.8333	13.5298
SmedASXL_070785	1.14517	1.0791
SmedASXL_067681	1.31938	1.36387
SmedASXL_009741	73.2238	68.8065
SmedASXL_011508	8.28771	9.36903
SmedASXL_009662	1.50811	1.52208
SmedASXL_063176	1.24679	1.17403
SmedASXL_076983	1.90008	2.15489
SmedASXL_044521	1.0871	1
SmedASXL_039187	1.15969	1.18985
SmedASXL_063925	1.0871	1.11074
SmedASXL_005590	21.6582	25.3635
SmedASXL_051743	1	1.01582
SmedASXL_000561	1.01452	1.01582
SmedASXL_046996	1.11614	1.09492
SmedASXL_017103	14.2834	12.1534
SmedASXL_037294	1.11614	1.0791
SmedASXL_059351	1.04355	1.04746
SmedASXL_000625	24.9246	22.0096
SmedASXL_049942	1	1
SmedASXL_007097	29.2217	27.436
SmedASXL_061590	1.74038	1.64864
SmedASXL_008479	20.2355	20.744
SmedASXL_067999	1.47907	1.25313
SmedASXL_049428	1	1.12656
SmedASXL_047809	1.01452	1.03164
SmedASXL_076754	2.20494	1.82266
SmedASXL_043539	1.01452	1.01582
SmedASXL_029985	1.0871	1.1582
SmedASXL_048343	1.01452	1.03164
SmedASXL_001386	8.66516	8.67293
SmedASXL_004614	1.10162	1.14238
SmedASXL_022758	1.14517	1.14238
SmedASXL_042102	1.01452	1.01582
SmedASXL_027234	1.04355	1
SmedASXL_049255	1.24679	1.11074
SmedASXL_042129	1.10162	1.11074
SmedASXL_062251	1.04355	1.06328
SmedASXL_049338	1.07259	1.09492
SmedASXL_079913	1.18873	1.17403
SmedASXL_045117	1	1.04746
SmedASXL_022521	1.05807	1.01582
SmedASXL_013429	77.3903	73.347
SmedASXL_005802	1.37745	1.36387
SmedASXL_050199	1.23228	1.12656
SmedASXL_044240	1.01452	1
SmedASXL_049360	1.10162	1.1582
SmedASXL_055162	1.01452	1.04746
SmedASXL_074585	1.26131	1.22149
SmedASXL_062268	1.30486	1.18985
SmedASXL_060863	1.01452	1.01582
SmedASXL_055876	1.15969	1.11074
SmedASXL_001157	1.26131	1.33223
SmedASXL_017956	15.0818	15.982
SmedASXL_011765	19.9306	22.2627
SmedASXL_011335	94.8982	89.6263
SmedASXL_058932	1.07259	1.09492
SmedASXL_010111	9.73945	8.2616
SmedASXL_032925	1.23228	1.11074
SmedASXL_074577	1.29035	1.28477
SmedASXL_071501	1.34842	1.36387
SmedASXL_043139	1.01452	1
SmedASXL_028138	1	1.01582
SmedASXL_038421	1.07259	1.04746
SmedASXL_041301	1	1.01582
SmedASXL_025339	1.10162	1.11074
SmedASXL_038279	1.01452	1
SmedASXL_028204	1.04355	1.0791
SmedASXL_048634	1	1
SmedASXL_006200	10.4798	11.3624
SmedASXL_007752	2.16139	2.45548
SmedASXL_031973	1.37745	1.25313
SmedASXL_025391	1.01452	1.06328
SmedASXL_072393	1.24679	1.31641
SmedASXL_018616	4.10671	3.73694
SmedASXL_063163	1.65328	1.83849
SmedASXL_009329	27.0586	38.3521
SmedASXL_014930	19.0741	16.7888
SmedASXL_077366	1.24679	1.25313
SmedASXL_008435	2.91629	2.56623
SmedASXL_022594	1.18873	1.30059
SmedASXL_053605	1.52262	1.617
SmedASXL_049261	1.04355	1.03164
SmedASXL_050692	1.02903	1.03164
SmedASXL_030367	1.01452	1.01582
SmedASXL_004356	3.54054	3.45217
SmedASXL_021881	1.27583	1.33223
SmedASXL_033069	1.11614	1.06328
SmedASXL_016794	53.5528	54.5998
SmedASXL_029174	1.05807	1
SmedASXL_072876	1.55166	1.75938
SmedASXL_079024	294.672	244.113
SmedASXL_066992	1.02903	1.09492
SmedASXL_070134	1.52262	1.09492
SmedASXL_003672	1.0871	1.01582
SmedASXL_075779	2.74208	2.69279
SmedASXL_011033	123.759	133.829
SmedASXL_029357	1.74038	1.60118
SmedASXL_014482	43.7681	32.3245
SmedASXL_060102	1.6678	1.68028
SmedASXL_045152	3.1776	2.9301
SmedASXL_018357	9.73945	11.4099
SmedASXL_054106	1	1
SmedASXL_039855	1.02903	1.09492
SmedASXL_043894	1	1.04746
SmedASXL_019398	14.7915	12.3749
SmedASXL_052088	1.18873	1.12656
SmedASXL_027518	1.15969	1.03164
SmedASXL_064014	1.04355	1.03164
SmedASXL_029406	1.95815	2.29728
SmedASXL_039574	1.11614	1.18985
SmedASXL_073279	1.55166	1.88595
SmedASXL_052162	1.43552	1.45879
SmedASXL_017234	81.2084	83.3139
SmedASXL_049102	1.02903	1.0791
SmedASXL_020636	1.07259	1.04746
SmedASXL_051015	222.52	204.625
SmedASXL_001798	1	1
SmedASXL_066849	4.04864	2.26564
SmedASXL_038007	1.01452	1.01582
SmedASXL_044405	1.01452	1.01582
SmedASXL_050122	1.01452	1.01582
SmedASXL_010453	38.9629	30.6792
SmedASXL_052216	1.27583	1.25313
SmedASXL_050462	1.05807	1.01582
SmedASXL_023766	1.01452	1.03164
SmedASXL_055760	1.02903	1.06328
SmedASXL_083403	1.07259	1.04746
SmedASXL_018819	173.277	196.035
SmedASXL_036529	1	1.01582
SmedASXL_056415	7.66346	7.75534
SmedASXL_067341	2.36463	2.07579
SmedASXL_056279	1.01452	1.01582
SmedASXL_018739	91.9512	84.8169
SmedASXL_007857	1.10162	1.0791
SmedASXL_074825	5.83428	6.93268
SmedASXL_049230	1.01452	1.04746
SmedASXL_019382	1.07259	1
SmedASXL_074913	1.31938	1.28477
SmedASXL_000310	1.04355	1.12656
SmedASXL_014533	37.424	39.5229
SmedASXL_008964	3.0905	3.40471
SmedASXL_036860	1	1
SmedASXL_006143	1.24679	1.36387
SmedASXL_062721	1.11614	1.1582
SmedASXL_026011	1.18873	1.14238
SmedASXL_047318	1.04355	1.01582
SmedASXL_017796	26.9861	28.844
SmedASXL_039460	1.01452	1.01582
SmedASXL_001808	19.7564	17.7539
SmedASXL_039302	1.01452	1.01582
SmedASXL_031472	1.05807	1.04746
SmedASXL_053652	1.68232	1.47461
SmedASXL_003710	1	1.06328
SmedASXL_040179	1	1.01582
SmedASXL_027094	1.11614	1.03164
SmedASXL_050423	1.21776	1.20567
SmedASXL_002234	61.7696	65.421
SmedASXL_061849	1.29035	1.34805
SmedASXL_009982	14.4721	14.1626
SmedASXL_026052	1.46456	1.41133
SmedASXL_081329	1.13066	1.14238
SmedASXL_006284	225.627	186.922
SmedASXL_006918	42.5051	40.3772
SmedASXL_068648	2.29204	2.18654
SmedASXL_033373	1.04355	1.09492
SmedASXL_072660	2.19042	2.91428
SmedASXL_066814	1.01452	1.03164
SmedASXL_047095	1	1
SmedASXL_030594	1.11614	1.14238
SmedASXL_063736	1.15969	1.20567
SmedASXL_002854	1.02903	1
SmedASXL_080611	1.0871	1.06328
SmedASXL_058623	1.01452	1.03164
SmedASXL_010711	36.0449	42.5129
SmedASXL_025641	1.04355	1
SmedASXL_028609	1.02903	1.03164
SmedASXL_033194	1.04355	1.03164
SmedASXL_022245	1.05807	1.14238
SmedASXL_016238	37.7144	42.3864
SmedASXL_050333	1.07259	1.06328
SmedASXL_018758	1.18873	1.12656
SmedASXL_061936	1	1.03164
SmedASXL_017867	4.80355	4.60707
SmedASXL_036379	1.05807	1.01582
SmedASXL_010803	2.27753	2.26564
SmedASXL_050310	1.15969	1.09492
SmedASXL_025289	1.07259	1.11074
SmedASXL_045756	1.04355	1
SmedASXL_011444	8.51999	9.89111
SmedASXL_074614	5.83428	5.92017
SmedASXL_070932	1.14517	1.12656
SmedASXL_060948	1.01452	1.04746
SmedASXL_055385	1.10162	1.09492
SmedASXL_067454	1.15969	1.06328
SmedASXL_048190	1.02903	1.12656
SmedASXL_066519	5.602	5.46137
SmedASXL_012465	3.23567	2.9301
SmedASXL_019640	7.11181	7.45475
SmedASXL_072586	2.07428	2.09161
SmedASXL_032573	1.0871	1.14238
SmedASXL_024735	1.01452	1.11074
SmedASXL_022580	1.10162	1.0791
SmedASXL_055870	1.01452	1.01582
SmedASXL_043869	1.02903	1.04746
SmedASXL_059450	1.07259	1.06328
SmedASXL_047350	1.71135	1.55372
SmedASXL_046316	1.04355	1.01582
SmedASXL_010487	25.3456	26.6133
SmedASXL_066532	2.0888	1.6961
SmedASXL_030114	1.15969	1.17403
SmedASXL_000724	3.59861	4.14827
SmedASXL_003079	133.877	112.265
SmedASXL_081334	1	1.03164
SmedASXL_042242	1.05807	1.01582
SmedASXL_049740	1.11614	1.23731
SmedASXL_037448	1.24679	1.26895
SmedASXL_043571	1.39197	1.52208
SmedASXL_019727	1.31938	1.55372
SmedASXL_025646	1.01452	1
SmedASXL_037774	1	1.03164
SmedASXL_030659	6.74887	7.47057
SmedASXL_011171	1.30486	1.5379
SmedASXL_010847	109.866	116.569
SmedASXL_048680	1.14517	1.18985
SmedASXL_052944	1.01452	1
SmedASXL_011020	7.11181	7.6446
SmedASXL_055448	1.01452	1.01582
SmedASXL_066370	2.7566	2.97756
SmedASXL_022491	1.04355	1.09492
SmedASXL_053919	1.01452	1.06328
SmedASXL_004441	1.37745	1.56954
SmedASXL_050389	1.0871	1.0791
SmedASXL_046643	1.04355	1.01582
SmedASXL_012026	39.079	37.6086
SmedASXL_083398	1.02903	1.0791
SmedASXL_074072	1.17421	1.1582
SmedASXL_008636	15.2415	15.0802
SmedASXL_004628	2.35011	2.18654
SmedASXL_078002	1.05807	1.01582
SmedASXL_060034	1.04355	1
SmedASXL_026268	1.30486	1.37969
SmedASXL_010459	8.12802	7.45475
SmedASXL_078674	1.15969	1.23731
SmedASXL_072066	4.12123	4.27484
SmedASXL_043167	1.07259	1.03164
SmedASXL_069993	3.7583	3.45217
SmedASXL_081934	1.02903	1
SmedASXL_054094	1.24679	1.25313
SmedASXL_007246	2.5098	2.66115
SmedASXL_081035	1.11614	1.04746
SmedASXL_000037	1	1.01582
SmedASXL_083338	1.11614	1.26895
SmedASXL_015962	2.48077	2.3922
SmedASXL_037570	1.01452	1.0791
SmedASXL_066174	1.76942	1.88595
SmedASXL_061348	1.18873	1.17403
SmedASXL_000659	6.13914	6.01509
SmedASXL_057014	1.04355	1.06328
SmedASXL_066290	6.6037	4.92348
SmedASXL_069538	1.43552	1.617
SmedASXL_033985	1.0871	1.12656
SmedASXL_064634	1.29035	1.22149
SmedASXL_059708	2.11784	2.12325
SmedASXL_036885	1.01452	1.04746
SmedASXL_065728	1.04355	1.04746
SmedASXL_004929	3.48247	3.7053
SmedASXL_009772	5.61652	5.99927
SmedASXL_010758	5.92138	6.09419
SmedASXL_079086	1.14517	1.1582
SmedASXL_075766	1.05807	1.0791
SmedASXL_065377	1.26131	1.26895
SmedASXL_080508	1.10162	1.22149
SmedASXL_079553	1.01452	1.04746
SmedASXL_072365	2.29204	2.10743
SmedASXL_065245	1.07259	1.09492
SmedASXL_082208	1.01452	1.03164
SmedASXL_015519	12.28	11.7737
SmedASXL_035447	1.02903	1.01582
SmedASXL_024146	1.74038	1.58536
SmedASXL_072542	1.53714	1.5379
SmedASXL_055165	1.39197	1.41133
SmedASXL_067969	1.53714	1.52208
SmedASXL_028702	1.13066	1.12656
SmedASXL_015822	31.5881	35.3779
SmedASXL_053013	1.40649	1.26895
SmedASXL_062566	1.10162	1.09492
SmedASXL_001616	1.13066	1.0791
SmedASXL_012206	116.065	105.573
SmedASXL_077931	1.04355	1.12656
SmedASXL_032052	1.02903	1
SmedASXL_032691	1.15969	1.22149
SmedASXL_057635	1.01452	1.01582
SmedASXL_060782	1.15969	1.1582
SmedASXL_033350	1.01452	1
SmedASXL_009990	8.8684	13.9253
SmedASXL_007575	1.05807	1.18985
SmedASXL_037543	1.30486	1.20567
SmedASXL_037249	1.05807	1.11074
SmedASXL_042372	1.04355	1.01582
SmedASXL_072168	4.89065	4.10081
SmedASXL_024614	1.07259	1.20567
SmedASXL_075879	28.8588	27.8948
SmedASXL_036900	1.05807	1.06328
SmedASXL_040236	1.05807	1.03164
SmedASXL_038400	1.10162	1.03164
SmedASXL_078587	2.35011	2.02833
SmedASXL_077468	1.20324	1.36387
SmedASXL_013818	3.1776	2.81935
SmedASXL_021591	1.10162	1.20567
SmedASXL_001887	1.10162	1.09492
SmedASXL_018098	1.6678	1.50626
SmedASXL_011038	91.4141	107.725
SmedASXL_036912	1.07259	1.17403
SmedASXL_054446	1.24679	1.44297
SmedASXL_013994	15.9093	19.0828
SmedASXL_078604	1.65328	1.37969
SmedASXL_012374	28.2491	27.8157
SmedASXL_003212	2.97436	3.15158
SmedASXL_037716	1.01452	1
SmedASXL_053746	1.0871	1.14238
SmedASXL_010643	52.4785	60.3901
SmedASXL_013179	7.72153	7.39147
SmedASXL_019802	2.43722	2.09161
SmedASXL_049838	1.02903	1.01582
SmedASXL_009149	6.19721	8.60965
SmedASXL_063495	1.17421	1.23731
SmedASXL_015520	6.22625	7.15416
SmedASXL_021457	1.07259	1.09492
SmedASXL_035771	1.02903	1
SmedASXL_006801	9.17327	9.1159
SmedASXL_036616	1.02903	1
SmedASXL_040840	1.10162	1.04746
SmedASXL_035731	1.07259	1.03164
SmedASXL_075589	1.60973	1.5379
SmedASXL_024524	1.14517	1.12656
SmedASXL_005808	1.43552	1.23731
SmedASXL_054911	1	1
SmedASXL_071449	1.15969	1.09492
SmedASXL_045534	1.01452	1.03164
SmedASXL_064603	1.29035	1.26895
SmedASXL_038920	1.26131	1.30059
SmedASXL_003217	1	1
SmedASXL_009876	10.0298	11.0935
SmedASXL_067961	1.15969	1.20567
SmedASXL_021877	1.17421	1.06328
SmedASXL_004221	98.9341	91.4773
SmedASXL_021547	1.01452	1.06328
SmedASXL_048010	1.04355	1.06328
SmedASXL_028378	1.0871	1.06328
SmedASXL_015832	20.5404	23.3543
SmedASXL_038451	1	1.01582
SmedASXL_006875	80.5551	75.641
SmedASXL_037099	1.01452	1
SmedASXL_056737	1.10162	1.14238
SmedASXL_035314	1.10162	1.04746
SmedASXL_015938	23.139	20.6016
SmedASXL_066837	1.55166	1.41133
SmedASXL_071580	1.7549	1.47461
SmedASXL_056894	1	1
SmedASXL_008149	1.81297	1.82266
SmedASXL_023094	1	1.01582
SmedASXL_066471	1.60973	1.42715
SmedASXL_004883	1.02903	1.06328
SmedASXL_021667	1.07259	1.18985
SmedASXL_003617	1	1.01582
SmedASXL_018094	63.6859	63.475
SmedASXL_032727	1.05807	1.06328
SmedASXL_009427	8.40385	8.2616
SmedASXL_004537	1.65328	1.31641
SmedASXL_049162	1.04355	1
SmedASXL_013327	15.6916	16.5673
SmedASXL_035409	1.14517	1.25313
SmedASXL_066614	1.05807	1.04746
SmedASXL_049362	1.11614	1.04746
SmedASXL_036172	1.05807	1.04746
SmedASXL_041768	1.04355	1.01582
SmedASXL_070583	1.17421	1.14238
SmedASXL_043184	1.17421	1.22149
SmedASXL_007573	1.39197	1.44297
SmedASXL_021967	1.30486	1.42715
SmedASXL_071527	1.20324	1.30059
SmedASXL_010999	2.05977	3.38889
SmedASXL_076485	1.17421	1.0791
SmedASXL_061324	1	1
SmedASXL_057480	1.04355	1.06328
SmedASXL_044967	1.01452	1.01582
SmedASXL_040792	1.0871	1.03164
SmedASXL_039281	1.21776	1.09492
SmedASXL_026039	1	1.03164
SmedASXL_063287	1.10162	1.06328
SmedASXL_051791	1	1
SmedASXL_064018	1.10162	1.1582
SmedASXL_005257	26.1441	20.918
SmedASXL_063420	1.27583	1.22149
SmedASXL_001773	26.1441	21.1711
SmedASXL_055301	1.04355	1.03164
SmedASXL_079284	1.04355	1.17403
SmedASXL_046481	1	1.01582
SmedASXL_045929	1.11614	1.22149
SmedASXL_065598	2.6695	1.50626
SmedASXL_064825	1.07259	1.0791
SmedASXL_022603	1.07259	1.04746
SmedASXL_028836	1.05807	1.03164
SmedASXL_056396	1.37745	1.34805
SmedASXL_016569	8.95551	8.07175
SmedASXL_048866	1.02903	1.01582
SmedASXL_070908	1.34842	1.37969
SmedASXL_004824	25.1859	22.7373
SmedASXL_018835	53.0012	47.4964
SmedASXL_041812	1.20324	1.03164
SmedASXL_064527	1.0871	1.03164
SmedASXL_051885	1.05807	1.03164
SmedASXL_003752	25.8247	22.8006
SmedASXL_011858	11.3799	9.76454
SmedASXL_076193	1.27583	1.39551
SmedASXL_037226	1.04355	1.04746
SmedASXL_019914	5.5149	5.60376
SmedASXL_017962	45.8877	51.4198
SmedASXL_052996	1.01452	1.01582
SmedASXL_071819	1.36293	1.64864
SmedASXL_079982	1	1.04746
SmedASXL_048176	1.11614	1.12656
SmedASXL_028356	1.05807	1.0791
SmedASXL_028781	1.53714	1.34805
SmedASXL_010460	2.27753	3.0092
SmedASXL_081941	1	1.01582
SmedASXL_060474	1.3339	1.28477
SmedASXL_075732	1.13066	1.09492
SmedASXL_012264	3.64216	3.94261
SmedASXL_038926	1.04355	1.03164
SmedASXL_061606	1.10162	1.17403
SmedASXL_058122	36.161	34.2705
SmedASXL_025131	1.11614	1.04746
SmedASXL_040837	1.05807	1.12656
SmedASXL_031437	1.01452	1.03164
SmedASXL_040486	1.01452	1
SmedASXL_071232	1.20324	1.50626
SmedASXL_034191	1.02903	1
SmedASXL_035529	1.02903	1.09492
SmedASXL_023655	1.01452	1.0791
SmedASXL_081002	1.3339	1.30059
SmedASXL_078474	2.36463	2.04415
SmedASXL_049331	1.01452	1.03164
SmedASXL_057163	1	1.03164
SmedASXL_045377	1.0871	1.0791
SmedASXL_041795	1.04355	1.01582
SmedASXL_070185	1.15969	1.14238
SmedASXL_039330	1.04355	1
SmedASXL_051537	1.29035	1.30059
SmedASXL_050332	18.7983	22.6582
SmedASXL_039956	1.04355	1.0791
SmedASXL_001100	10.7847	11.5997
SmedASXL_055447	1.05807	1.14238
SmedASXL_025921	1.05807	1.01582
SmedASXL_055642	1	1
SmedASXL_053163	1.07259	1.03164
SmedASXL_013764	7.89574	8.24578
SmedASXL_000094	1.36293	1.25313
SmedASXL_014971	44.073	42.9559
SmedASXL_019112	1.37745	1.39551
SmedASXL_031969	1.10162	1.20567
SmedASXL_078961	1.13066	1.04746
SmedASXL_052144	1.07259	1
SmedASXL_015316	25.6505	22.7532
SmedASXL_039129	1.01452	1.03164
SmedASXL_071873	2.69853	3.24651
SmedASXL_033076	1.18873	1.1582
SmedASXL_052985	1.20324	1.25313
SmedASXL_039873	1	1
SmedASXL_063028	1.29035	1.30059
SmedASXL_024204	1.11614	1.14238
SmedASXL_060420	1.26131	1.17403
SmedASXL_010525	2.21946	2.55041
SmedASXL_079127	1.01452	1
SmedASXL_049928	1.40649	1.37969
SmedASXL_016485	39.6016	45.7087
SmedASXL_029856	1.15969	1.22149
SmedASXL_027387	1.15969	1.20567
SmedASXL_023097	1.04355	1.03164
SmedASXL_069184	1.87104	1.64864
SmedASXL_014328	52.072	53.7138
SmedASXL_070163	4.03413	3.67366
SmedASXL_016777	226.716	233.308
SmedASXL_039008	1.10162	1.0791
SmedASXL_071419	2.61143	2.72443
SmedASXL_050927	1.56618	1.42715
SmedASXL_065317	1.60973	1.617
SmedASXL_023671	1	1.01582
SmedASXL_006865	19.5677	18.5607
SmedASXL_069427	1.50811	1.17403
SmedASXL_074557	3.65668	3.92679
SmedASXL_011011	19.8	20.301
SmedASXL_018299	3.88895	3.04084
SmedASXL_037601	1	1.01582
SmedASXL_042968	1.29035	1.23731
SmedASXL_067792	1.07259	1.0791
SmedASXL_069952	2.55336	2.83517
SmedASXL_062217	1.82749	1.7752
SmedASXL_059887	1.14517	1.12656
SmedASXL_045248	1.04355	1.04746
SmedASXL_019783	1.65328	1.41133
SmedASXL_004283	1.20324	1.14238
SmedASXL_051972	1.04355	1.04746
SmedASXL_068255	1.07259	1.01582
SmedASXL_049179	1.02903	1
SmedASXL_069617	1.74038	1.52208
SmedASXL_041021	1.07259	1.23731
SmedASXL_020755	1.59521	1.52208
SmedASXL_072668	1.11614	1.12656
SmedASXL_041355	1.17421	1.11074
SmedASXL_020070	1.18873	1.11074
SmedASXL_069124	1.23228	1.26895
SmedASXL_072407	5.79073	6.18912
SmedASXL_010406	540.276	539.64
SmedASXL_041376	1.05807	1.03164
SmedASXL_042858	1.01452	1.03164
SmedASXL_054076	1.04355	1.01582
SmedASXL_052308	1.05807	1.03164
SmedASXL_013903	11.859	11.1884
SmedASXL_049535	1.05807	1.01582
SmedASXL_038535	1.07259	1.03164
SmedASXL_073099	1.40649	1.37969
SmedASXL_061077	13.4559	11.5523
SmedASXL_059545	1.46456	1.28477
SmedASXL_000188	1.18873	1.09492
SmedASXL_079748	1.29035	1.18985
SmedASXL_065016	1.11614	1.09492
SmedASXL_026978	1.04355	1.09492
SmedASXL_002115	30.3541	34.5869
SmedASXL_048921	1.02903	1
SmedASXL_032014	1	1
SmedASXL_015922	84.5909	74.7392
SmedASXL_029993	1.05807	1.12656
SmedASXL_018718	13.8043	28.7808
SmedASXL_072120	1.91459	1.66446
SmedASXL_009484	1.58069	1.39551
SmedASXL_081629	1.17421	1.11074
SmedASXL_034005	1.14517	1.12656
SmedASXL_046716	1.04355	1.01582
SmedASXL_029760	1.04355	1.09492
SmedASXL_011329	5.67459	6.66373
SmedASXL_026526	1.13066	1.1582
SmedASXL_039736	1.07259	1.11074
SmedASXL_020198	1.20324	1.14238
SmedASXL_067239	1.01452	1.04746
SmedASXL_060443	1.31938	1.25313
SmedASXL_060536	1.02903	1.01582
SmedASXL_066064	1.20324	1.09492
SmedASXL_041116	1.10162	1.01582
SmedASXL_051324	1.30486	1.1582
SmedASXL_000044	6.44401	7.31237
SmedASXL_013230	3.85992	3.26233
SmedASXL_023268	1.04355	1.04746
SmedASXL_078478	1.6678	1.87013
SmedASXL_079851	1.10162	1.23731
SmedASXL_047246	1.07259	1.14238
SmedASXL_041631	1.0871	1.01582
SmedASXL_049467	1.01452	1.01582
SmedASXL_065823	1.13066	1.11074
SmedASXL_037079	1.05807	1.03164
SmedASXL_028541	1.46456	1.34805
SmedASXL_082474	1.05807	1.11074
SmedASXL_019285	1.04355	1.03164
SmedASXL_034316	1.02903	1.06328
SmedASXL_053607	1.05807	1.0791
SmedASXL_046970	1	1.01582
SmedASXL_064991	1.17421	1.17403
SmedASXL_064668	1.21776	1.28477
SmedASXL_020428	1.04355	1.01582
SmedASXL_020376	1.30486	1.34805
SmedASXL_016044	8.6942	9.16336
SmedASXL_071300	2.19042	1.96505
SmedASXL_002812	1.14517	1.14238
SmedASXL_070968	2.26301	2.10743
SmedASXL_034707	1.60973	1.5379
SmedASXL_050112	1.05807	1.0791
SmedASXL_077588	2.20494	2.09161
SmedASXL_082823	1.04355	1.01582
SmedASXL_022929	1.04355	1.04746
SmedASXL_073510	1.63876	1.37969
SmedASXL_039467	1.01452	1
SmedASXL_047018	1.07259	1.04746
SmedASXL_022871	1.37745	1.34805
SmedASXL_056436	1.01452	1
SmedASXL_050408	1.21776	1.17403
SmedASXL_010935	6.12463	5.38227
SmedASXL_038442	1.01452	1.01582
SmedASXL_026559	1.18873	1.26895
SmedASXL_068687	1.56618	1.90177
SmedASXL_041668	1.02903	1.01582
SmedASXL_034952	1.15969	1.1582
SmedASXL_083172	1.20324	1.17403
SmedASXL_038693	1.02903	1.04746
SmedASXL_027397	1.13066	1.12656
SmedASXL_019978	1.10162	1.14238
SmedASXL_013211	31.922	32.989
SmedASXL_067773	2.85822	2.62951
SmedASXL_018136	1.62425	1.49043
SmedASXL_057484	1.23228	1.22149
SmedASXL_060123	1.34842	1.42715
SmedASXL_038190	1.05807	1.14238
SmedASXL_032681	1.11614	1.11074
SmedASXL_081800	1.05807	1.03164
SmedASXL_028362	1	1
SmedASXL_005366	47.1797	49.0784
SmedASXL_026353	1.02903	1.04746
SmedASXL_060696	1.01452	1.01582
SmedASXL_036864	1.04355	1.03164
SmedASXL_035677	1.01452	1.06328
SmedASXL_005353	59.2726	71.6226
SmedASXL_041819	1.05807	1.0791
SmedASXL_036819	1.17421	1.34805
SmedASXL_045185	1.02903	1
SmedASXL_009712	4.5132	4.92348
SmedASXL_043421	1.02903	1.04746
SmedASXL_030000	1.21776	1.28477
SmedASXL_017475	8.40385	7.70788
SmedASXL_051471	1.43552	1.41133
SmedASXL_009983	1.62425	3.24651
SmedASXL_061069	1.23228	1.18985
SmedASXL_044196	1.02903	1
SmedASXL_018690	281.156	240.569
SmedASXL_017674	4.10671	3.80022
SmedASXL_072067	1.43552	1.25313
SmedASXL_033404	1.07259	1.03164
SmedASXL_049553	1.07259	1.09492
SmedASXL_052065	1.14517	1.12656
SmedASXL_012227	63.1343	56.7197
SmedASXL_009901	22.2534	21.0287
SmedASXL_057709	1.04355	1.03164
SmedASXL_052176	1.05807	1.09492
SmedASXL_027553	1.15969	1.12656
SmedASXL_044918	1.01452	1.04746
SmedASXL_042373	1.02903	1.09492
SmedASXL_026799	1.04355	1.04746
SmedASXL_058663	1.14517	1.11074
SmedASXL_010794	7.61991	8.07175
SmedASXL_054271	1.0871	1.01582
SmedASXL_021542	1.07259	1.09492
SmedASXL_048644	1.02903	1.01582
SmedASXL_062479	1.01452	1.01582
SmedASXL_025337	1.14517	1.12656
SmedASXL_009633	21.5421	26.6766
SmedASXL_042295	1.10162	1.04746
SmedASXL_078100	1.34842	1.30059
SmedASXL_056223	1.01452	1
SmedASXL_040048	1.02903	1.1582
SmedASXL_012345	3.56957	4.4014
SmedASXL_040799	1.14517	1.06328
SmedASXL_051367	1.10162	1.12656
SmedASXL_002055	1.26131	1.44297
SmedASXL_027730	1.17421	1.17403
SmedASXL_033711	1.02903	1
SmedASXL_048425	1.30486	1.39551
SmedASXL_001515	7.98285	8.16667
SmedASXL_001340	7.28601	6.9485
SmedASXL_068283	1.62425	1.617
SmedASXL_006192	6.70532	6.75865
SmedASXL_016505	21.8034	23.6707
SmedASXL_001699	1.10162	1.01582
SmedASXL_070694	2.93081	2.74025
SmedASXL_074635	1.24679	1.36387
SmedASXL_008556	17.7095	16.3933
SmedASXL_050907	1	1
SmedASXL_003426	775.312	794.096
SmedASXL_017538	297.401	295.008
SmedASXL_061691	1.23228	1.34805
SmedASXL_021965	1.07259	1.12656
SmedASXL_041168	1.24679	1.17403
SmedASXL_060971	1.90008	2.56623
SmedASXL_010244	10.4943	11.3308
SmedASXL_009759	191.337	174.155
SmedASXL_076451	2.93081	3.26233
SmedASXL_076364	1.72587	1.99669
SmedASXL_000284	1	1
SmedASXL_001319	4.97775	5.38227
SmedASXL_010494	4.91968	5.39809
SmedASXL_009161	37.5257	89.3732
SmedASXL_023154	1	1
SmedASXL_014219	22.8341	20.0478
SmedASXL_052171	1.02903	1.06328
SmedASXL_007587	1.05807	1.06328
SmedASXL_071981	1.39197	1.42715
SmedASXL_071179	1.47907	1.52208
SmedASXL_053492	1.02903	1.04746
SmedASXL_042757	1.07259	1.04746
SmedASXL_024819	1.01452	1.0791
SmedASXL_001405	2.16139	3.38889
SmedASXL_012637	21.7017	18.5765
SmedASXL_050413	1	1.0791
SmedASXL_043685	1	1.01582
SmedASXL_071622	1.45004	1.33223
SmedASXL_077154	1.421	1.50626
SmedASXL_043036	1.20324	1.1582
SmedASXL_048237	1.05807	1.06328
SmedASXL_023555	1.18873	1.25313
SmedASXL_031523	1.10162	1.06328
SmedASXL_060184	1.13066	1.0791
SmedASXL_026579	1.17421	1.1582
SmedASXL_045224	1.01452	1.04746
SmedASXL_066332	1.78394	1.68028
SmedASXL_045376	1.02903	1.01582
SmedASXL_040905	1.17421	1.25313
SmedASXL_011677	1.53714	1.49043
SmedASXL_072599	8.4474	10.1442
SmedASXL_033506	1.07259	1.06328
SmedASXL_052028	1.0871	1.14238
SmedASXL_025892	1.18873	1.30059
SmedASXL_001162	1.02903	1.01582
SmedASXL_056292	1.07259	1.06328
SmedASXL_043414	1.02903	1.01582
SmedASXL_049774	1	1
SmedASXL_066451	1.45004	1.28477
SmedASXL_078589	1.07259	1.12656
SmedASXL_039227	1.01452	1.01582
SmedASXL_072224	2.40818	2.78771
SmedASXL_058020	1.01452	1
SmedASXL_059885	1.24679	1.33223
SmedASXL_008785	20.5839	24.525
SmedASXL_000879	1.10162	1.14238
SmedASXL_070710	2.17591	2.83517
SmedASXL_005208	1.421	1.83849
SmedASXL_078435	1.69683	1.56954
SmedASXL_024874	1.18873	1.04746
SmedASXL_043788	1.0871	1.11074
SmedASXL_076921	1.05807	1.06328
SmedASXL_069969	1.49359	1.47461
SmedASXL_042045	1.10162	1.11074
SmedASXL_010938	7.06825	7.0276
SmedASXL_051503	1.11614	1.1582
SmedASXL_009246	30.2379	27.9897
SmedASXL_030521	1.14517	1.18985
SmedASXL_037872	1.02903	1.14238
SmedASXL_015068	25.0262	27.5468
SmedASXL_037138	1.04355	1.06328
SmedASXL_076414	2.39367	2.3131
SmedASXL_048482	1.0871	1.14238
SmedASXL_023615	1.07259	1.20567
SmedASXL_022843	2.3356	1.99669
SmedASXL_010676	1.29035	1.18985
SmedASXL_053468	1.24679	1.50626
SmedASXL_014887	20.642	26.8348
SmedASXL_047875	1.02903	1.0791
SmedASXL_063080	1.421	1.72774
SmedASXL_055963	1.01452	1.04746
SmedASXL_037561	1.02903	1.06328
SmedASXL_008327	69.0428	75.6726
SmedASXL_033481	2.04525	1.96505
SmedASXL_070744	1.29035	1.41133
SmedASXL_027521	1.421	1.31641
SmedASXL_056154	1.02903	1
SmedASXL_025755	1.07259	1.09492
SmedASXL_071439	1.53714	1.36387
SmedASXL_000491	2.30656	1.91759
SmedASXL_074798	1.14517	1.26895
SmedASXL_062404	1.43552	1.60118
SmedASXL_002758	20.5839	26.3444
SmedASXL_063015	1.56618	1.50626
SmedASXL_052093	1.04355	1
SmedASXL_012534	11.8299	11.0302
SmedASXL_083033	1.14517	1.09492
SmedASXL_020706	1.02903	1
SmedASXL_038414	1.01452	1.06328
SmedASXL_007066	65.036	66.1962
SmedASXL_054564	1.05807	1.11074
SmedASXL_013344	7.83767	7.31237
SmedASXL_042468	1.04355	1.01582
SmedASXL_009785	1.04355	1.56954
SmedASXL_081600	1.01452	1.03164
SmedASXL_013597	12.4687	10.0018
SmedASXL_009957	1.81297	1.68028
SmedASXL_007021	595.006	645.194
SmedASXL_025305	1.04355	1.01582
SmedASXL_079014	1.04355	1.06328
SmedASXL_019444	20.7	20.0004
SmedASXL_045637	1.60973	1.47461
SmedASXL_027306	1	1.03164
SmedASXL_016528	11.6267	11.9319
SmedASXL_009123	1.71135	1.6961
SmedASXL_021185	1.14517	1.12656
SmedASXL_008177	4.15027	2.64533
SmedASXL_044731	1.02903	1.03164
SmedASXL_016868	354.86	342.88
SmedASXL_013278	23.3712	20.7914
SmedASXL_068952	1.10162	1.11074
SmedASXL_019256	7.6054	8.70457
SmedASXL_014643	13.5575	14.574
SmedASXL_032552	1.11614	1.17403
SmedASXL_076400	2.01621	1.80684
SmedASXL_052191	1.50811	1.617
SmedASXL_062719	1.39197	1.37969
SmedASXL_002795	1.40649	1.39551
SmedASXL_051115	1.43552	1.34805
SmedASXL_011708	51.3897	47.2274
SmedASXL_036382	1.07259	1.03164
SmedASXL_002593	1	1
SmedASXL_016971	20.2936	17.6906
SmedASXL_033303	1.05807	1
SmedASXL_002510	1.21776	1.09492
SmedASXL_012735	85.6507	72.9515
SmedASXL_082266	1.40649	1.28477
SmedASXL_056509	1.59521	1.49043
SmedASXL_062957	1.27583	1.26895
SmedASXL_003836	1.11614	1.23731
SmedASXL_037229	1.04355	1.06328
SmedASXL_011650	3.32278	3.59456
SmedASXL_013773	21.6292	23.0063
SmedASXL_059794	1.10162	1.09492
SmedASXL_082026	1.17421	1.12656
SmedASXL_075972	4.44061	4.60707
SmedASXL_060802	1.01452	1
SmedASXL_072774	1.13066	1.33223
SmedASXL_018309	25.5343	28.1321
SmedASXL_011001	184.238	150.63
SmedASXL_034310	1.02903	1.0791
SmedASXL_005825	1.04355	1
SmedASXL_082185	1	1
SmedASXL_041470	1.01452	1
SmedASXL_066958	1.30486	1.17403
SmedASXL_023080	1.0871	1.14238
SmedASXL_018997	1.04355	1.01582
SmedASXL_005169	30.8041	44.7752
SmedASXL_002006	1.10162	1.23731
SmedASXL_046003	1.23228	1.18985
SmedASXL_065684	1.13066	1.23731
SmedASXL_019638	21.092	16.8996
SmedASXL_059809	1.0871	1.20567
SmedASXL_015049	196.012	210.289
SmedASXL_023618	1.0871	1.06328
SmedASXL_018560	1.82749	1.60118
SmedASXL_029034	1.04355	1.03164
SmedASXL_066575	1.3339	1.04746
SmedASXL_009640	7.21343	6.12583
SmedASXL_004877	1.21776	1.17403
SmedASXL_007805	4.74548	3.37307
SmedASXL_068258	2.93081	2.69279
SmedASXL_083225	1.02903	1.03164
SmedASXL_071490	2.0888	1.68028
SmedASXL_047309	1.13066	1.0791
SmedASXL_024186	1.10162	1.03164
SmedASXL_052759	1.3339	1.45879
SmedASXL_013813	23.6616	24.6358
SmedASXL_031800	1.02903	1.09492
SmedASXL_032275	1.13066	1.17403
SmedASXL_042152	1.07259	1.06328
SmedASXL_055614	1.34842	1.22149
SmedASXL_000413	1.05807	1.03164
SmedASXL_082829	1.0871	1.11074
SmedASXL_022344	1.01452	1.06328
SmedASXL_073181	1.15969	1.12656
SmedASXL_063544	1.71135	1.68028
SmedASXL_045255	1.02903	1.06328
SmedASXL_060731	1.26131	1.1582
SmedASXL_020885	1.07259	1.06328
SmedASXL_004207	192.89	158.604
SmedASXL_061699	1.23228	1.33223
SmedASXL_017621	4.28092	4.2432
SmedASXL_082621	1.0871	1.17403
SmedASXL_013472	1.82749	1.64864
SmedASXL_083109	1.34842	1.26895
SmedASXL_009593	57.3564	63.0321
SmedASXL_018405	33.3737	35.2671
SmedASXL_063960	1.0871	1.11074
SmedASXL_037620	1.20324	1.12656
SmedASXL_032289	1.05807	1.11074
SmedASXL_022389	1.07259	1.03164
SmedASXL_032314	1.02903	1.11074
SmedASXL_064922	1.31938	1.25313
SmedASXL_043019	1.02903	1.03164
SmedASXL_047824	1.01452	1.06328
SmedASXL_050828	1.50811	1.41133
SmedASXL_045116	1.05807	1.0791
SmedASXL_057927	1.21776	1.1582
SmedASXL_083285	1.05807	1.06328
SmedASXL_005559	12.3235	13.8304
SmedASXL_039630	1.02903	1.01582
SmedASXL_050494	1.0871	1.11074
SmedASXL_067057	1.7549	1.60118
SmedASXL_007800	4.81806	5.03422
SmedASXL_053584	1.04355	1.06328
SmedASXL_030662	1.01452	1
SmedASXL_074650	1.10162	1.17403
SmedASXL_054464	1.07259	1.09492
SmedASXL_002068	1.11614	1.14238
SmedASXL_008813	9.0281	9.47977
SmedASXL_059569	1.01452	1.04746
SmedASXL_002124	1.36293	1.49043
SmedASXL_052467	1.0871	1
SmedASXL_015275	4.0922	5.05004
SmedASXL_063961	1.13066	1.06328
SmedASXL_035648	1.05807	1.04746
SmedASXL_011671	64.0053	67.794
SmedASXL_035159	1.01452	1.0791
SmedASXL_034599	1.01452	1.0791
SmedASXL_031271	1.05807	1.06328
SmedASXL_052122	2.71305	2.72443
SmedASXL_013034	1.50811	1.79102
SmedASXL_069296	1.0871	1.06328
SmedASXL_012108	43.8262	40.9467
SmedASXL_056672	1.07259	1.12656
SmedASXL_048852	1.47907	1.5379
SmedASXL_017666	9.08616	9.55888
SmedASXL_009430	1.94363	2.20236
SmedASXL_010649	36.3062	43.0983
SmedASXL_013854	23.168	28.6225
SmedASXL_060369	1.07259	1.0791
SmedASXL_012368	45.6118	42.7819
SmedASXL_058240	1.10162	1.06328
SmedASXL_002017	1.49359	1.50626
SmedASXL_059958	1.01452	1.03164
SmedASXL_053847	1.14517	1.03164
SmedASXL_044170	1.02903	1.01582
SmedASXL_013396	19.1467	15.7447
SmedASXL_071996	1.55166	1.74356
SmedASXL_061743	1	1.04746
SmedASXL_076208	2.81467	2.20236
SmedASXL_076803	1.87104	1.96505
SmedASXL_061387	1.01452	1
SmedASXL_081086	1.02903	1
SmedASXL_033763	1.15969	1.18985
SmedASXL_057205	1.0871	1.09492
SmedASXL_028238	1.02903	1.03164
SmedASXL_047086	1.05807	1.03164
SmedASXL_031179	1.02903	1.01582
SmedASXL_042268	1.13066	1.03164
SmedASXL_062058	1.71135	1.52208
SmedASXL_077472	1.421	1.25313
SmedASXL_042368	1.39197	1.30059
SmedASXL_060609	1.07259	1.03164
SmedASXL_065466	1.55166	1.49043
SmedASXL_044696	1.07259	1.14238
SmedASXL_038482	1.02903	1
SmedASXL_078712	1.0871	1.12656
SmedASXL_008739	3.04695	3.15158
SmedASXL_076897	1.56618	1.68028
SmedASXL_078704	1.68232	2.01251
SmedASXL_041585	1.04355	1.01582
SmedASXL_065282	1.46456	1.5379
SmedASXL_026624	1.11614	1.12656
SmedASXL_030713	1.07259	1.0791
SmedASXL_049430	1.17421	1.20567
SmedASXL_046738	1.04355	1
SmedASXL_059782	1.18873	1.14238
SmedASXL_076078	2.11784	2.29728
SmedASXL_018980	62.1035	65.6899
SmedASXL_041808	1.01452	1
SmedASXL_000599	1.10162	1.09492
SmedASXL_043613	1.14517	1.0791
SmedASXL_029393	1.10162	1.12656
SmedASXL_079232	3.7583	1.52208
[truncated: 80,343 more rows]

## Sheet: Top 100 down-regulated genes
Transcript Identity	Gene	Fold down-regulation in mex3-1(RNAi)	Blastx to fly	e score	Blastx to mouse	e score
SmedASXL_009684	pmp-11	141.318	#N/A	#N/A	#N/A	#N/A
SmedASXL_009682		131.701	#N/A	#N/A	#N/A	#N/A
SmedASXL_004096		67.5707	#N/A	#N/A	#N/A	#N/A
SmedASXL_009939	pmp-8	43.2872	#N/A	#N/A	#N/A	#N/A
SmedASXL_003039	pmp-9	36.5073	#N/A	#N/A	#N/A	#N/A
SmedASXL_073532	prog-2	32.4031	#N/A	#N/A	#N/A	#N/A
SmedASXL_002991		31.0857	#N/A	#N/A	#N/A	#N/A
SmedASXL_010535	prog-2-3	28.9993	#N/A	#N/A	#N/A	#N/A
SmedASXL_014068	prog-2-1	26.5464	#N/A	#N/A	#N/A	#N/A
SmedASXL_012073	prog-2-5	25.0447	#N/A	#N/A	#N/A	#N/A
SmedASXL_002794		23.8606	#N/A	#N/A	#N/A	#N/A
SmedASXL_006858	pmp-7	23.1653	#N/A	#N/A	#N/A	#N/A
SmedASXL_010536	prog-2-4	22.6452	#N/A	#N/A	#N/A	#N/A
SmedASXL_059179		22.6071	#N/A	#N/A	#N/A	#N/A
SmedASXL_004080		22.0081	#N/A	#N/A	#N/A	#N/A
SmedASXL_051900		21.128	#N/A	#N/A	#N/A	#N/A
SmedASXL_013928		17.7638	DCOR1_DROME_Ornithine_decarboxylase_1	5e-27	DCOR_MOUSE_Ornithine_decarboxylase	1e-35
SmedASXL_018040	pmp-5	17.5895	#N/A	#N/A	#N/A	#N/A
SmedASXL_002889	AGAT-1	17.5378	A1Z927_DROME_Sin3A,_isoform_A	1.7	GATM_MOUSE_Glycine_amidinotransferase,_mitochondrial	2e-103
SmedASXL_005341	pmp-10	17.1841	#N/A	#N/A	#N/A	#N/A
SmedASXL_002658	prog-1-10	15.6463	#N/A	#N/A	#N/A	#N/A
SmedASXL_004691		15.5719	#N/A	#N/A	#N/A	#N/A
SmedASXL_018741	AGAT-2	15.5103	#N/A	#N/A	GATM_MOUSE_Glycine_amidinotransferase,_mitochondrial	9e-99
SmedASXL_002399		15.5014	#N/A	#N/A	#N/A	#N/A
SmedASXL_003140		15.1749	#N/A	#N/A	#N/A	#N/A
SmedASXL_003595	prog-1-7	15.0717	#N/A	#N/A	#N/A	#N/A
SmedASXL_009962	prog-1-8	14.8739	#N/A	#N/A	#N/A	#N/A
SmedASXL_018710	pmp-6	14.1944	#N/A	#N/A	#N/A	#N/A
SmedASXL_013084	pmp-3	12.8582	#N/A	#N/A	#N/A	#N/A
SmedASXL_000915		12.277	#N/A	#N/A	#N/A	#N/A
SmedASXL_002002		12.2458	Q8IML0_DROME_CG14507	2e-07	Q6GTW1_MOUSE_Calcium-dependent_phospholipase_A2	1e-13
SmedASXL_004197		12.1074	#N/A	#N/A	#N/A	#N/A
SmedASXL_002169	pmp-4	12.1002	#N/A	#N/A	#N/A	#N/A
SmedASXL_010658	AGAT-3	11.6882	#N/A	#N/A	GATM_MOUSE_Glycine_amidinotransferase,_mitochondrial	1e-92
SmedASXL_004473	prog-1-5	11.6318	#N/A	#N/A	#N/A	#N/A
SmedASXL_007110		11.2278	CP18A_DROME_Cytochrome_P450_18a1	3e-26	Q3UNV2_MOUSE_Protein_Cyp2j11	3e-31
SmedASXL_010882		10.9701	#N/A	#N/A	#N/A	#N/A
SmedASXL_005473		10.9049	Q9VJ98_DROME_CG5783	1e-06	#N/A	#N/A
SmedASXL_004429		10.5589	#N/A	#N/A	#N/A	#N/A
SmedASXL_008106	prog-2-2	10.5267	#N/A	#N/A	#N/A	#N/A
SmedASXL_004193		10.1862	#N/A	#N/A	#N/A	#N/A
SmedASXL_010749	AGAT-4	9.68785	#N/A	#N/A	GATM_MOUSE_Glycine_amidinotransferase,_mitochondrial	5e-95
SmedASXL_013664	prog-1-10	9.42836	#N/A	#N/A	#N/A	#N/A
SmedASXL_034206		9.40838	#N/A	#N/A	#N/A	#N/A
SmedASXL_018259	Smed-aminopeptidase N-1	9.2908	Q8IRH1_DROME_FI19310p1	5e-37	TRHDE_MOUSE_Thyrotropin-releasing_hormone-degrading_ectoenzyme	3e-42
SmedASXL_065575		9.14542	Q9VZM6_DROME_CG32262	3e-21	M17L2_MOUSE_Mpv17-like_protein_2	3e-12
SmedASXL_011495	H.63.4c (Category 3 marker)	9.07711	DCOR1_DROME_Ornithine_decarboxylase_1	4e-46	DCOR_MOUSE_Ornithine_decarboxylase	2e-68
SmedASXL_005223	prog-1-6	8.9981	#N/A	#N/A	#N/A	#N/A
SmedASXL_071929		8.59068	#N/A	#N/A	#N/A	#N/A
SmedASXL_002064		8.28374	#N/A	#N/A	#N/A	#N/A
SmedASXL_007083		8.26741	DCOR1_DROME_Ornithine_decarboxylase_1	2e-55	DCOR_MOUSE_Ornithine_decarboxylase	2e-68
SmedASXL_011484	prog-1	8.12805	#N/A	#N/A	#N/A	#N/A
SmedASXL_009322		7.85604	M9PCK7_DROME_Adenylyltransferase_and_sulfurtransferase_MOCS3	6e-68	MOCS3_MOUSE_Adenylyltransferase_and_sulfurtransferase_MOCS3	2e-72
SmedASXL_008207	prog-1-2	7.83984	#N/A	#N/A	#N/A	#N/A
SmedASXL_005723	prog-1-4	7.79665	#N/A	#N/A	#N/A	#N/A
SmedASXL_004777		7.64168	#N/A	#N/A	#N/A	#N/A
SmedASXL_003907		7.63735	#N/A	#N/A	#N/A	#N/A
SmedASXL_019268		7.59279	Q6NLM7_DROME_CG33514	2e-27	CLVS2_MOUSE_Clavesin-2	3e-17
SmedASXL_015716		7.31526	CP18A_DROME_Cytochrome_P450_18a1	6e-35	CP2U1_MOUSE_Cytochrome_P450_2U1	5e-42
SmedASXL_018064	SVOP-1	6.72124	Q8SYM5_DROME_CG4324	3e-31	SVOP_MOUSE_Synaptic_vesicle_2-related_protein	1e-36
SmedASXL_009844		6.57034	Q9W0H8_DROME_IP16409p	1e-42	RCN1_MOUSE_Reticulocalbin-1	8e-43
SmedASXL_016218		6.47156	Q4V579_DROME_CG8925,_isoform_B	1e-10	S22A7_MOUSE_Solute_carrier_family_22_member_7	2e-10
SmedASXL_079556		6.21713	#N/A	#N/A	#N/A	#N/A
SmedASXL_012089	DCOR-1	6.07728	DCOR2_DROME_Ornithine_decarboxylase_2	7e-36	DCOR_MOUSE_Ornithine_decarboxylase	6e-48
SmedASXL_005683		6.06576	#N/A	#N/A	#N/A	#N/A
SmedASXL_009683		6.04687	#N/A	#N/A	#N/A	#N/A
SmedASXL_011384	mex3-1	5.93579	Q9V4F3_DROME_CG11360,_isoform_A	6e-13	D3YTR3_MOUSE_RNA-binding_protein_MEX3D	3e-15
SmedASXL_003799	prog-1-3	5.72487	#N/A	#N/A	#N/A	#N/A
SmedASXL_005369		5.68914	#N/A	#N/A	#N/A	#N/A
SmedASXL_006141		5.59757	Q8IRE5_DROME_CG32280,_isoform_A	6e-14	LITAF_MOUSE_Lipopolysaccharide-induced_tumor_necrosis_factor-alpha_factor_homolog	2e-12
SmedASXL_006449		5.58773	#N/A	#N/A	#N/A	#N/A
SmedASXL_066574		5.37965	#N/A	#N/A	#N/A	#N/A
SmedASXL_012205		5.36017	CP18A_DROME_Cytochrome_P450_18a1	1e-26	CP1A1_MOUSE_Cytochrome_P450_1A1	2e-28
SmedASXL_003593		5.19648	#N/A	#N/A	#N/A	#N/A
SmedASXL_003264		5.02243	#N/A	#N/A	#N/A	#N/A
SmedASXL_019494	NUCB1-2	4.9152	Q9VVK7_DROME_NUCB1	7e-38	NUCB1_MOUSE_Nucleobindin-1	1e-39
SmedASXL_069636		4.89906	#N/A	#N/A	#N/A	#N/A
SmedASXL_076791		4.88047	#N/A	#N/A	#N/A	#N/A
SmedASXL_016550		4.86252	Q9W058_DROME_Succinyl-CoA:3-ketoacid-coenzyme_A_transferase	9e-72	SCO2A_MOUSE_Succinyl-CoA:3-ketoacid_coenzyme_A_transferase_2A,_mitochondrial	2e-135
SmedASXL_013851		4.84137	#N/A	#N/A	#N/A	#N/A
SmedASXL_013044		4.8236	#N/A	#N/A	#N/A	#N/A
SmedASXL_013906		4.75875	#N/A	#N/A	#N/A	#N/A
SmedASXL_059323		4.7202	#N/A	#N/A	#N/A	#N/A
SmedASXL_049264		4.69515	#N/A	#N/A	#N/A	#N/A
SmedASXL_072845		4.69184	#N/A	#N/A	#N/A	#N/A
SmedASXL_018874		4.66302	#N/A	#N/A	#N/A	#N/A
SmedASXL_010443		4.65753	Q8IRE5_DROME_CG32280,_isoform_A	3e-05	LITAF_MOUSE_Lipopolysaccharide-induced_tumor_necrosis_factor-alpha_factor_homolog	4e-10
SmedASXL_012909		4.62601	Q7JWI7_DROME_CG11665	4e-07	B7ZCB4_MOUSE_Monocarboxylate_transporter_11_(Fragment)	5e-08
SmedASXL_008237		4.61479	#N/A	#N/A	#N/A	#N/A
SmedASXL_013905	prog-1-12	4.61021	#N/A	#N/A	#N/A	#N/A
SmedASXL_004659		4.50599	SC6A4_DROME_Sodium-dependent_serotonin_transporter	3e-100	SC6A9_MOUSE_Sodium-_and_chloride-dependent_glycine_transporter_1	2e-123
SmedASXL_077631		4.49476	#N/A	#N/A	#N/A	#N/A
SmedASXL_061545	prog-1-11	4.42047	#N/A	#N/A	#N/A	#N/A
SmedASXL_079150		4.40008	#N/A	#N/A	#N/A	#N/A
SmedASXL_013255		4.39166	#N/A	#N/A	#N/A	#N/A
SmedASXL_008166		4.20569	ASSY_DROME_Argininosuccinate_synthase	4e-125	ASSY_MOUSE_Argininosuccinate_synthase	6e-163
SmedASXL_018792		4.15783	#N/A	#N/A	#N/A	#N/A
SmedASXL_011559		4.0524	#N/A	#N/A	#N/A	#N/A
SmedASXL_019713	NUCB1-1	4.05135	Q9VVK7_DROME_NUCB1	2e-29	NUCB1_MOUSE_Nucleobindin-1	1e-34
SmedASXL_079022		3.99022	#N/A	#N/A	#N/A	#N/A
SmedASXL_005108		3.80582	CBPD_DROME_Carboxypeptidase_D	1e-39	CBPN_MOUSE_Carboxypeptidase_N_catalytic_chain	7e-57
SmedASXL_012683	pmp-1	3.77744	#N/A	#N/A	#N/A	#N/A
SmedASXL_003962		3.77138	#N/A	#N/A	#N/A	#N/A
SmedASXL_008246	NB.52.12f (Category 3 marker)	3.739	#N/A	#N/A	#N/A	#N/A
SmedASXL_010836		3.55256	#N/A	#N/A	#N/A	#N/A
SmedASXL_006086		3.54146	#N/A	#N/A	#N/A	#N/A
SmedASXL_004847		3.49798	#N/A	#N/A	#N/A	#N/A
SmedASXL_016470		3.42598	Q7K3N4_DROME_CG8888	2e-20	BDH_MOUSE_D-beta-hydroxybutyrate_dehydrogenase,_mitochondrial	1e-37
SmedASXL_013384		3.37432	#N/A	#N/A	#N/A	#N/A
SmedASXL_012447		3.35319	DHYS_DROME_Probable_deoxyhypusine_synthase	7e-105	DHYS_MOUSE_Deoxyhypusine_synthase	2e-111
SmedASXL_019111		3.32257	#N/A	#N/A	#N/A	#N/A
SmedASXL_001867		3.29581	#N/A	#N/A	#N/A	#N/A
SmedASXL_001816	XCT-1	3.2161	Q9VB75_DROME_GH08870p	2e-80	XCT_MOUSE_Cystine/glutamate_transporter	2e-85
SmedASXL_011063		3.06339	Q9V4E7_DROME_Transporter	1e-124	B2RQX9_MOUSE_Transporter	3e-133
SmedASXL_003658		3.05011	#N/A	#N/A	#N/A	#N/A
SmedASXL_065212		3.04377	#N/A	#N/A	#N/A	#N/A
SmedASXL_004711		3.03326	#N/A	#N/A	#N/A	#N/A
SmedASXL_004067		3.0221	#N/A	#N/A	#N/A	#N/A
SmedASXL_061217		2.96513	#N/A	#N/A	MGST3_MOUSE_Microsomal_glutathione_S-transferase_3	4e-17
SmedASXL_016460		2.93038	Q9VIH3_DROME_Microsomal_triacylglycerol_transfer_protein	5e-18	MTP_MOUSE_Microsomal_triglyceride_transfer_protein_large_subunit	3e-10
SmedASXL_018889		2.90892	Q8IMH4_DROME_Saposin-related,_isoform_B	5e-08	SAPL1_MOUSE_Proactivator_polypeptide-like_1	5e-06
SmedASXL_014739		2.88695	A8JR25_DROME_Fasciclin_1,_isoform_D	0.0003	POSTN_MOUSE_Periostin	2e-20
SmedASXL_051528		2.81173	#N/A	#N/A	#N/A	#N/A
SmedASXL_070463		2.78155	#N/A	#N/A	#N/A	#N/A
SmedASXL_006845		2.73041	O97428_DROME_Ciboulot,_isoform_A	1e-05	#N/A	#N/A
SmedASXL_070594		2.72976	#N/A	#N/A	#N/A	#N/A
SmedASXL_012097		2.72178	#N/A	#N/A	#N/A	#N/A
SmedASXL_002330		2.71693	#N/A	#N/A	#N/A	#N/A
SmedASXL_013043		2.69029	#N/A	#N/A	#N/A	#N/A
SmedASXL_019271		2.67528	#N/A	#N/A	#N/A	#N/A
SmedASXL_011893		2.66772	Q8SYM5_DROME_CG4324	2e-27	SVOPL_MOUSE_Putative_transporter_SVOPL	1e-41
SmedASXL_081091		2.65989	#N/A	#N/A	#N/A	#N/A
SmedASXL_013733		2.56433	#N/A	#N/A	#N/A	#N/A
SmedASXL_067930		2.52869	Q9VHX7_DROME_CG2781	3e-40	ELOV7_MOUSE_Elongation_of_very_long_chain_fatty_acids_protein_7	3e-39
SmedASXL_011604		2.52342	E1JI93_DROME_Tequila,_isoform_E	4e-99	NETR_MOUSE_Neurotrypsin	3e-88
SmedASXL_016936		2.51341	CP18A_DROME_Cytochrome_P450_18a1	2e-47	E9Q593_MOUSE_Protein_Cyp2b23	8e-58
SmedASXL_006620		2.50805	#N/A	#N/A	#N/A	#N/A
SmedASXL_066857		2.50504	#N/A	#N/A	#N/A	#N/A
SmedASXL_052483		2.48599	#N/A	#N/A	#N/A	#N/A
SmedASXL_079232		2.46919	#N/A	#N/A	#N/A	#N/A
SmedASXL_079123		2.4455	#N/A	#N/A	#N/A	#N/A
SmedASXL_017389		2.43422	ORCT_DROME_Organic_cation_transporter_protein	1e-28	S22A3_MOUSE_Solute_carrier_family_22_member_3	4e-30
SmedASXL_019036		2.42673	Q9W2M4_DROME_CG10527	3e-22	#N/A	#N/A
SmedASXL_010618		2.42636	Q9VZM6_DROME_CG32262	1e-15	M17L2_MOUSE_Mpv17-like_protein_2	5e-16
SmedASXL_079808		2.4225	#N/A	#N/A	#N/A	#N/A
SmedASXL_067177		2.41547	#N/A	#N/A	#N/A	#N/A
SmedASXL_008128		2.41101	Q9VED3_DROME_Stripe,_isoform_A	3e-24	EGR1_MOUSE_Early_growth_response_protein_1	2e-24
SmedASXL_002629		2.41088	#N/A	#N/A	#N/A	#N/A
SmedASXL_076230		2.40238	#N/A	#N/A	#N/A	#N/A
SmedASXL_012132		2.39874	#N/A	#N/A	#N/A	#N/A
SmedASXL_015729		2.39459	Q9Y166_DROME_BcDNA.GH02431	4e-66	DIC_MOUSE_Mitochondrial_dicarboxylate_carrier	4e-65
SmedASXL_015467		2.37975	Q2MGL8_DROME_CG33966	8e-19	TTPAL_MOUSE_Alpha-tocopherol_transfer_protein-like	1e-17
SmedASXL_048827		2.37562	#N/A	#N/A	#N/A	#N/A
SmedASXL_015374	TRAF6-1	2.37181	Q9W3I9_DROME_GH01161p	6e-10	TRAF6_MOUSE_TNF_receptor-associated_factor_6	1e-10
SmedASXL_076312		2.36024	#N/A	#N/A	#N/A	#N/A
SmedASXL_018089		2.35787	E1JI93_DROME_Tequila,_isoform_E	3e-96	NETR_MOUSE_Neurotrypsin	2e-85
SmedASXL_068550		2.3567	#N/A	#N/A	#N/A	#N/A
SmedASXL_008042	egr-1	2.35419	Q9VED3_DROME_Stripe,_isoform_A	3e-25	D3Z3K7_MOUSE_E3_SUMO-protein_ligase_EGR2	2e-25
SmedASXL_074602		2.32992	#N/A	#N/A	#N/A	#N/A
SmedASXL_017056		2.32253	CP18A_DROME_Cytochrome_P450_18a1	1e-16	E9Q816_MOUSE_Protein_Cyp2w1	7e-21
SmedASXL_007068		2.32164	Q7JYK2_DROME_CG1941	4e-66	MOGT2_MOUSE_2-acylglycerol_O-acyltransferase_2	2e-94
SmedASXL_004106		2.30458	Q9VYH1_DROME_Ferritin	9e-22	FRIH_MOUSE_Ferritin_heavy_chain	1e-21
SmedASXL_008827		2.29687	#N/A	#N/A	#N/A	#N/A
SmedASXL_006770		2.29506	#N/A	#N/A	#N/A	#N/A
SmedASXL_010636		2.29243	ACH1_DROME_Acetylcholine_receptor_subunit_alpha-like_1	7e-76	ACHA5_MOUSE_Neuronal_acetylcholine_receptor_subunit_alpha-5	4e-60
SmedASXL_014916		2.24853	B7Z0U6_DROME_Bestrophin_1,_isoform_B	8e-46	BEST3_MOUSE_Bestrophin-3	2e-42
SmedASXL_006203	prog-1-15	2.21022	#N/A	#N/A	#N/A	#N/A
SmedASXL_012880		2.20992	B7Z0K1_DROME_Bitesize,_isoform_H	5e-05	SYT15_MOUSE_Synaptotagmin-15	3e-08
SmedASXL_005659		2.20643	#N/A	#N/A	#N/A	#N/A
SmedASXL_011261		2.20475	Q7K4C2_DROME_CG7737	8e-17	KDM1B_MOUSE_Lysine-specific_histone_demethylase_1B	5e-12
SmedASXL_009926		2.19444	#N/A	#N/A	#N/A	#N/A
SmedASXL_019528		2.19296	#N/A	#N/A	#N/A	#N/A
SmedASXL_062900		2.1908	#N/A	#N/A	#N/A	#N/A
SmedASXL_005900		2.17946	#N/A	#N/A	#N/A	#N/A
SmedASXL_018027		2.15086	#N/A	#N/A	#N/A	#N/A
SmedASXL_014707		2.14839	#N/A	#N/A	#N/A	#N/A
SmedASXL_013042		2.14498	#N/A	#N/A	#N/A	#N/A
SmedASXL_013940		2.14494	Q8IH57_DROME_GH10249p	2e-07	E9PU92_MOUSE_MFS-type_transporter_SLC18B1	4e-28
SmedASXL_006137	SmedASXL_006137	2.14025	#N/A	#N/A	#N/A	#N/A
SmedASXL_079339		2.13791	#N/A	#N/A	#N/A	#N/A
SmedASXL_012152		2.13124	SBNO_DROME_Protein_strawberry_notch	2e-123	SBNO1_MOUSE_Protein_strawberry_notch_homolog_1	5e-124
SmedASXL_006626	MCP1, Cat. 3 H.45.8g	2.12101	Q9VKZ5_DROME_CG4995,_isoform_A	7e-29	S2548_MOUSE_Solute_carrier_family_25_member_48	3e-28
SmedASXL_010696		2.12095	#N/A	#N/A	#N/A	#N/A
SmedASXL_018553		2.11889	#N/A	#N/A	#N/A	#N/A
SmedASXL_006418		2.10934	#N/A	#N/A	CLYBL_MOUSE_Citrate_lyase_subunit_beta-like_protein,_mitochondrial	2e-42
SmedASXL_003977		2.10911	#N/A	#N/A	PLAC8_MOUSE_Placenta-specific_gene_8_protein	4e-11
SmedASXL_007870		2.10668	#N/A	#N/A	#N/A	#N/A
SmedASXL_016819		2.06807	Q9VIM0_DROME_CG2493,_isoform_A	1e-89	PCP_MOUSE_Lysosomal_Pro-X_carboxypeptidase	3e-99
SmedASXL_010411		2.06347	#N/A	#N/A	BGH3_MOUSE_Transforming_growth_factor-beta-induced_protein_ig-h3	2e-20
SmedASXL_013165		2.0596	ACE_DROME_Angiotensin-converting_enzyme	3e-90	F6QCP8_MOUSE_Angiotensin-converting_enzyme_(Fragment)	1e-98
SmedASXL_015566		2.05789	#N/A	#N/A	#N/A	#N/A
SmedASXL_012573		2.05407	Q76NS2_DROME_Anoctamin	1e-110	ANO2_MOUSE_Anoctamin-2	4e-135
SmedASXL_073164		2.02395	#N/A	#N/A	#N/A	#N/A
SmedASXL_003982		2.01948	#N/A	#N/A	#N/A	#N/A
SmedASXL_008805		2.00861	#N/A	#N/A	#N/A	#N/A
SmedASXL_007901		2.00437	#N/A	#N/A	#N/A	#N/A
SmedASXL_004993		2.00352	#N/A	#N/A	#N/A	#N/A
SmedASXL_016165		1.99936	#N/A	#N/A	#N/A	#N/A
SmedASXL_008454	Smed-p53	1.98131	Q9W2C9_DROME_Lysyl_oxidase-like_2	7e-59	E9Q600_MOUSE_Lysyl_oxidase_homolog_4	3e-47

## Sheet: Confirmed mex3-1 down
Genes identified and cloned through down-regulation after mex3-1(RNAi)
Name	Transcript
SmedASXL_009682	SmedASXL_009682
SmedASXL_059179	SmedASXL_059179
SmedASXL_049264	SmedASXL_049264
SmedASXL_000915	SmedASXL_000915
SmedASXL_002991	SmedASXL_002991
MOCS3-1	SmedASXL_009322
SmedASXL_004080	SmedASXL_004080
SmedASXL_051900	SmedASXL_051900
SmedASXL_034206	SmedASXL_034206
SmedASXL_002794	SmedASXL_002794
SmedASXL_079556	SmedASXL_079556
DCOR-2	SmedASXL_013928
SmedASXL_071929	SmedASXL_071929
SmedASXL_005369	SmedASXL_005369
PLA2G5	SmedASXL_002002
SLC22A7-1	SmedASXL_016218
CG5783-1	SmedASXL_005473
SmedASXL_004777	SmedASXL_004777
SmedASXL_004691	SmedASXL_004691
SmedASXL_018040	SmedASXL_018040
LITAF-1	SmedASXL_010443
